# Supplementary material for: Identification of proteins related to SIS3 by iTRAQ and PRM-based comparative proteomic analysis in cisplatin-induced acute kidney injury
Source: PeerJ journal article supplement (doi:10.7717/peerj.17485), 2024-06-04
Supplement: PRM.xlsx [file PRM.xlsx]

## Sheet: Sheet1
N	Total	Unused	Accession	Name	Citable Accession	Gene Name	Species	Mass(KDa)	GRAVY	Isoelectric Point	%Cov(95)	Peptides(95%)	Protein IDs	ProtSeq	Run1_Peptide num.	Run1_Specturm num.	Run1_unique Peptide num.	Run1_Peptides	Run1_Specturm	Run1_unique Peptide	Run2_Peptide num.	Run2_Specturm num.	Run2_unique Peptide num.	Run2_Peptides	Run2_Specturm	Run2_unique Peptide	Run3_Peptide num.	Run3_Specturm num.	Run3_unique Peptide num.	Run3_Peptides	Run3_Specturm	Run3_unique Peptide	Pval SB:CK	Pval SB:SIS3	Pval SIS3-SB:CK	Pval SIS3-SB:SB	Pval SIS3-SB:SIS3	Pval SIS3:CK	Run1_115:113	Run1_115:117	Run1_115:119	Run1_117:113	Run1_117:119	Run1_119:113	Run2_115:113	Run2_115:117	Run2_115:119	Run2_117:113	Run2_117:119
52	79.71	78.88	sp|Q9JIL4|NHRF3_MOUSE	Na(+)/H(+) exchange regulatory cofactor NHE-RF3 OS=Mus musculus OX=10090 GN=Pdzk1 PE=1 SV=1	Q9JIL4	Pdzk1	MOUSE	56.4983	-0.515029	5.29	73.8	65	sp|Q9JIL4|NHRF3_MOUSE;tr|A0A0R4J1V0|A0A0R4J1V0_MOUSE	MASTFNPRECKLSKQEGQNYGFFLRIEKDTDGHLIRVIEEGSPAEKAGLLDGDRVLRINGVFVDKEEHAQVVELVRKSGNSVTLLVLDGDSYEKAVKNQVDLKELDQSQREAALNDKKPGPGMNGAVEPCAQPRLCYLVKEGNSFGFSLKTIQGKKGVYLTDIMPQGVAMKAGVLADDHLIEVNGENVENASHEEVVEKVTKSGSRIMFLLVDKETARCHSEQKTQFKRETASLKLLPHQPRVVVIKKGSNGYGFYLRAGPEQKGQIIKDIEPGSPAEAAGLKNNDLVVAVNGKSVEALDHDGVVEMIRKGGDQTTLLVLDKEAESIYSLARFSPLLYCQSQELPNGSVKEGPAPIPAPLEATGSEPTEDAEGHKPKLCRLLKEDDSYGFHLNAIRGQP…	55	96	55	SVEALDHDGVVEMIR(iTRAQ8plex@N-term);SGNSVTLLVLDGDSYEK(iTRAQ8plex@N-term; iTRAQ8plex(K)@17);AGLENEDVIIEVNGENVQEEPYDRVVER(iTRAQ8plex@N-term; Deamidated(N)@13);AGLENEDVIIEVNGENVQEEPYDR(iTRAQ8plex@N-term; Deamidated(N)@13);FSPLLYCQSQELPNGSVK(iTRAQ8plex@N-term; Methylthio(C)@7; Deamidated(N)@14; iTRAQ8plex(K)@18);SVEALDHDGVVEMIR(iTRAQ8plex@N-term; iTRAQ8plex(S)@1);LSKQEGQNYGFFLR(iTRAQ8plex@N-term; iTRA…	19.1.1.7653.1;14.1.1.7321.1;13.1.1.7306.1;10.1.1.9036.1;20.1.1.10442.1;19.1.1.9278.1;3.1.1.5739.1;15.1.1.4963.1;20.1.1.9934.1;4.1.1.7596.1;9.1.1.9420.1;5.1.1.8201.1;20.1.1.9200.1;10.1.1.7729.1;19.1.1.6642.1;19.1.1.10797.1;13.1.1.4647.1;11.1.1.2325.1;15.1.1.6008.1;20.1.1.10048.1;14.1.1.10966.1;4.1.1.5235.1;11.1.1.4412.1;1.1.1.10089.1;8.1.1.5892.1;19.1.1.9714.1;8.1.1.10336.1;19.1.1.10181.1;8.1.1.63…	SVEALDHDGVVEMIR(iTRAQ8plex@N-term);AGLENEDVIIEVNGENVQEEPYDRVVER(iTRAQ8plex@N-term; Deamidated(N)@13);SGNSVTLLVLDGDSYEK(iTRAQ8plex@N-term; iTRAQ8plex(K)@17);AGLENEDVIIEVNGENVQEEPYDR(iTRAQ8plex@N-term; Deamidated(N)@13);FSPLLYCQSQELPNGSVK(iTRAQ8plex@N-term; Methylthio(C)@7; Deamidated(N)@14; iTRAQ8plex(K)@18);SVEALDHDGVVEMIR(iTRAQ8plex@N-term; iTRAQ8plex(S)@1);EAALNDKKPGPGMNGAVEPCAQPR(iTRAQ8plex@N-…	43	73	43	SVEALDHDGVVEMIR(iTRAQ8plex@N-term);AGVLADDHLIEVNGENVENASHEEVVEK(iTRAQ8plex@N-term; Deamidated(N)@13; Deamidated(N)@19; iTRAQ8plex(K)@28);SGNSVTLLVLDGDSYEK(iTRAQ8plex@N-term; iTRAQ8plex(K)@17);AGLENEDVIIEVNGENVQEEPYDRVVER(iTRAQ8plex@N-term; Deamidated(N)@16);AGLENEDVIIEVNGENVQEEPYDR(iTRAQ8plex@N-term; Deamidated(N)@13);FSPLLYCQSQELPNGSVK(iTRAQ8plex@N-term; Methylthio(C)@7; Deamidated(N)@14; iTRAQ8…	2.1.1.10945.1;13.1.1.3701.1;1.1.1.2205.1;10.1.1.6094.1;2.1.1.10159.1;7.1.1.10016.1;5.1.1.5908.1;11.1.1.6396.1;4.1.1.8644.1;6.1.1.6433.1;2.1.1.5206.1;6.1.1.5663.1;11.1.1.5318.1;14.1.1.1633.1;5.1.1.4633.1;20.1.1.13819.1;19.1.1.13649.1;12.1.1.7331.1;18.1.1.10524.1;20.1.1.9782.1;3.1.1.9944.1;2.1.1.8003.1;1.1.1.9042.1;9.1.1.13030.1;2.1.1.8119.1;5.1.1.5506.1;5.1.1.5062.1;18.1.1.667.1;1.1.1.9264.1;8.1.1…	SVEALDHDGVVEMIR(iTRAQ8plex@N-term);AGVLADDHLIEVNGENVENASHEEVVEK(iTRAQ8plex@N-term; Deamidated(N)@13; Deamidated(N)@19; iTRAQ8plex(K)@28);SGNSVTLLVLDGDSYEK(iTRAQ8plex@N-term; iTRAQ8plex(K)@17);AGLENEDVIIEVNGENVQEEPYDRVVER(iTRAQ8plex@N-term; Deamidated(N)@16);AGLENEDVIIEVNGENVQEEPYDR(iTRAQ8plex@N-term; Deamidated(N)@13);FSPLLYCQSQELPNGSVK(iTRAQ8plex@N-term; Methylthio(C)@7; Deamidated(N)@14; iTRAQ8…	65	147	65	SVEALDHDGVVEMIR(iTRAQ8plex@N-term);AGLENEDVIIEVNGENVQEEPYDRVVER(iTRAQ8plex@N-term; Deamidated(N)@13);AGLENEDVIIEVNGENVQEEPYDR(iTRAQ8plex@N-term; Deamidated(N)@13);SGNSVTLLVLDGDSYEK(iTRAQ8plex@N-term; Deamidated(N)@3; iTRAQ8plex(K)@17);KSGNSVTLLVLDGDSYEK(iTRAQ8plex@N-term; iTRAQ8plex(K)@1; Deamidated(N)@4; iTRAQ8plex(K)@18);IMFLLVDK(iTRAQ8plex@N-term; iTRAQ8plex(K)@8);SVEALDHDGVVEMIR(iTRAQ8plex@N-…	11.1.1.6904.1;4.1.1.988.1;4.1.1.11409.1;7.1.1.7833.1;20.1.1.2636.1;2.1.1.15532.1;15.1.1.12320.1;10.1.1.6016.1;11.1.1.4932.1;1.1.1.11687.1;18.1.1.14255.1;10.1.1.2340.1;12.1.1.4268.1;19.1.1.11748.1;20.1.1.410.1;3.1.1.9669.1;7.1.1.5773.1;19.1.1.377.1;13.1.1.8804.1;13.1.1.7297.1;1.1.1.10047.1;18.1.1.7678.1;7.1.1.8839.1;16.1.1.9151.1;8.1.1.10088.1;8.1.1.6828.1;1.1.1.11253.1;18.1.1.10701.1;14.1.1.11322…	SVEALDHDGVVEMIR(iTRAQ8plex@N-term);AGLENEDVIIEVNGENVQEEPYDRVVER(iTRAQ8plex@N-term; Deamidated(N)@13);AGLENEDVIIEVNGENVQEEPYDR(iTRAQ8plex@N-term; Deamidated(N)@13);KSGNSVTLLVLDGDSYEK(iTRAQ8plex@N-term; iTRAQ8plex(K)@1; Deamidated(N)@4; iTRAQ8plex(K)@18);SGNSVTLLVLDGDSYEK(iTRAQ8plex@N-term; Deamidated(N)@3; iTRAQ8plex(K)@17);IMFLLVDK(iTRAQ8plex@N-term; iTRAQ8plex(K)@8);KGSNGYGFYLR(iTRAQ8plex@N-term…	0.0466692	0.513466	0.0316303	0.0156063	0.0310638	0.0935354	0.77983	0.654636	0.704693	1.19124	1.07647	1.09648	0.751623	0.539511	0.549541	1.41906	1.00925
72	40.53	38.86	sp|Q00623|APOA1_MOUSE	Apolipoprotein A-I OS=Mus musculus OX=10090 GN=Apoa1 PE=1 SV=2	Q00623	Apoa1	MOUSE	30.6153	-0.761364	5.51	68.18	24	sp|Q00623|APOA1_MOUSE;tr|Q3V2G1|Q3V2G1_MOUSE	MKAVVLAVALVFLTGSQAWHVWQQDEPQSQWDKVKDFANVYVDAVKDSGRDYVSQFESSSLGQQLNLNLLENWDTLGSTVSQLQERLGPLTRDFWDNLEKETDWVRQEMNKDLEEVKQKVQPYLDEFQKKWKEDVELYRQKVAPLGAELQESARQKLQELQGRLSPVAEEFRDRMRTHVDSLRTQLAPHSEQMRESLAQRLAELKSNPTLNEYHTRAKTHLKTLGEKARPALEDLRHSLMPMLETLKTQVQSVIDKASETLTAQ	24	32	24	DSGRDYVSQFESSSLGQQLNLNLLENWDTLGSTVSQLQER(iTRAQ8plex@N-term);DFWDNLEKETDWVR(iTRAQ8plex@N-term; iTRAQ8plex(K)@8);QKLQELQGR(iTRAQ8plex@N-term; iTRAQ8plex(K)@2);HSLMPMLETLK(iTRAQ8plex@N-term; iTRAQ8plex(K)@11);NLLENWDTLGSTVSQLQER(iTRAQ8plex@N-term; Deamidated(N)@1);KWKEDVELYR(iTRAQ8plex@N-term; iTRAQ8plex(K)@1; iTRAQ8plex(K)@3);HSLMPMLETLK(No iTRAQ8plex@N-term; iTRAQ8plex(K)@11);DYVSQFESSSLGQQLNLNLLE…	17.1.1.2607.1;8.1.1.4880.1;11.1.1.864.1;14.1.1.8698.1;12.1.1.9554.1;16.1.1.9942.1;19.1.1.9763.1;18.1.1.5341.1;4.1.1.1119.1;19.1.1.12554.1;2.1.1.2341.1;12.1.1.8292.1;6.1.1.2757.1;6.1.1.2513.1;15.1.1.12857.1;19.1.1.12594.1;8.1.1.12365.1;4.1.1.11869.1;11.1.1.887.1;15.1.1.12819.1;14.1.1.747.1;14.1.1.5535.1;13.1.1.1881.1;18.1.1.1498.1;8.1.1.12883.1;8.1.1.12898.1;12.1.1.11318.1;2.1.1.2458.1;5.1.1.1132.…	DSGRDYVSQFESSSLGQQLNLNLLENWDTLGSTVSQLQER(iTRAQ8plex@N-term);DFWDNLEKETDWVR(iTRAQ8plex@N-term; iTRAQ8plex(K)@8);QKLQELQGR(iTRAQ8plex@N-term; iTRAQ8plex(K)@2);HSLMPMLETLK(iTRAQ8plex@N-term; iTRAQ8plex(K)@11);NLLENWDTLGSTVSQLQER(iTRAQ8plex@N-term; Deamidated(N)@1);KWKEDVELYR(iTRAQ8plex@N-term; iTRAQ8plex(K)@1; iTRAQ8plex(K)@3);HSLMPMLETLK(No iTRAQ8plex@N-term; iTRAQ8plex(K)@11);DYVSQFESSSLGQQLNLNLLE…	23	24	23	LLENWDTLGSTVSQLQER(iTRAQ8plex@N-term);LAELKSNPTLNEYHTR(iTRAQ8plex@N-term; iTRAQ8plex(K)@5);DSGRDYVSQFESSSLGQQLNLNLLENWDTLGSTVSQLQER(iTRAQ8plex@N-term);WHVWQQDEPQSQWDK(iTRAQ8plex@N-term; iTRAQ8plex(K)@15);DFWDNLEKETDWVR(iTRAQ8plex@N-term; iTRAQ8plex(K)@8);NLLENWDTLGSTVSQLQER(iTRAQ8plex@N-term; Deamidated(N)@1);QEMNKDLEEVK(Gln->pyro-Glu@N-term; iTRAQ8plex(K)@5; iTRAQ8plex(K)@11);VAPLGAELQESAR(iTRAQ…	14.1.1.11640.1;14.1.1.9558.1;14.1.1.628.1;2.1.1.10173.1;18.1.1.6967.1;3.1.1.530.1;19.1.1.9189.1;6.1.1.919.1;6.1.1.3258.1;9.1.1.8043.1;11.1.1.13029.1;8.1.1.3050.1;20.1.1.1672.1;18.1.1.4207.1;10.1.1.7455.1;14.1.1.1529.1;17.1.1.12403.1;2.1.1.8713.1;9.1.1.1048.1;2.1.1.12947.1;3.1.1.4769.1;9.1.1.11865.1;11.1.1.13054.1;14.1.1.8272.1	LAELKSNPTLNEYHTR(iTRAQ8plex@N-term; iTRAQ8plex(K)@5);LLENWDTLGSTVSQLQER(iTRAQ8plex@N-term);DSGRDYVSQFESSSLGQQLNLNLLENWDTLGSTVSQLQER(iTRAQ8plex@N-term);WHVWQQDEPQSQWDK(iTRAQ8plex@N-term; iTRAQ8plex(K)@15);DFWDNLEKETDWVR(iTRAQ8plex@N-term; iTRAQ8plex(K)@8);QEMNKDLEEVK(Gln->pyro-Glu@N-term; iTRAQ8plex(K)@5; iTRAQ8plex(K)@11);NLLENWDTLGSTVSQLQER(iTRAQ8plex@N-term; Deamidated(N)@1);VAPLGAELQESAR(iTRAQ…	30	48	30	QEMNKDLEEVK(iTRAQ8plex@N-term; iTRAQ8plex(K)@5; iTRAQ8plex(K)@11);QEMNKDLEEVK(Gln->pyro-Glu@N-term; Deamidated(N)@4; iTRAQ8plex(K)@5; iTRAQ8plex(K)@11);LLENWDTLGSTVSQLQER(iTRAQ8plex@N-term);LAELKSNPTLNEYHTR(iTRAQ8plex@N-term; iTRAQ8plex(K)@5);SNPTLNEYHTR(iTRAQ8plex@N-term; iTRAQ8plex(S)@1; Deamidated(N)@6);HSLMPMLETLK(iTRAQ8plex@N-term; Oxidation(M)@4; iTRAQ8plex(K)@11);DFWDNLEKETDWVR(iTRAQ8plex@…	20.1.1.5330.1;16.1.1.6591.1;13.1.1.465.1;19.1.1.5314.1;10.1.1.628.1;18.1.1.2067.1;1.1.1.9482.1;16.1.1.6447.1;14.1.1.11578.1;16.1.1.687.1;12.1.1.12552.1;14.1.1.11814.1;13.1.1.2561.1;18.1.1.7443.1;6.1.1.8147.1;13.1.1.9830.1;10.1.1.10148.1;14.1.1.8305.1;11.1.1.705.1;16.1.1.8606.1;18.1.1.5247.1;13.1.1.2627.1;2.1.1.13159.1;10.1.1.8556.1;4.1.1.996.1;6.1.1.10941.1;13.1.1.9778.1;19.1.1.9167.1;1.1.1.2285.…	LAELKSNPTLNEYHTR(iTRAQ8plex@N-term; iTRAQ8plex(K)@5);QEMNKDLEEVK(Gln->pyro-Glu@N-term; Deamidated(N)@4; iTRAQ8plex(K)@5; iTRAQ8plex(K)@11);QEMNKDLEEVK(iTRAQ8plex@N-term; iTRAQ8plex(K)@5; iTRAQ8plex(K)@11);LLENWDTLGSTVSQLQER(iTRAQ8plex@N-term);SNPTLNEYHTR(iTRAQ8plex@N-term; iTRAQ8plex(S)@1; Deamidated(N)@6);HSLMPMLETLK(iTRAQ8plex@N-term; Oxidation(M)@4; iTRAQ8plex(K)@11);DFWDNLEKETDWVR(iTRAQ8plex@…	0.00559633	0.040814	0.00262162	0.00120154	0.16113	0.0106909	2.77971	1.69044	1.35519	1.65959	0.787046	2.10863	3.37287	1.80302	1.21339	1.90546	0.672977
96	41.1	41	sp|Q9QXD6|F16P1_MOUSE	Fructose-1,6-bisphosphatase 1 OS=Mus musculus OX=10090 GN=Fbp1 PE=1 SV=3	Q9QXD6	Fbp1	MOUSE	36.9121	-0.125444	6.15	65.38	41	sp|Q9QXD6|F16P1_MOUSE	MANHAPFETDISTLTRFVMEQGRKAQGTGELTQLLNSLCTAIKAISSAVRQAGIAQLYGIAGSTNVTGDQVKKLDILSNDLVINMLKSSYATCVLVSEENTNAIIIEPEKRGKYVVCFDPLDGSSNIDCLVSIGTIFGIYRKKSTDEPSEKDALQPGRDLVAAGYALYGSATMLVLAMDCGVNCFMLDPSIGEFIMVDRDVKMKKKGNIYSLNEGYAKDFDPAINEYLQRKKFPPDGSAPYGARYVGSMVADIHRTLVYGGIFLYPANKKSPSGKLRLLYECNPIAYVMEKAGGLATTGDKDILDIVPTEIHQKAPVVMGSSEDVQEFLEIYRKHKAK	46	115	46	GNIYSLNEGYAK(iTRAQ8plex@N-term; Deamidated(N)@7; iTRAQ8plex(K)@12);YVGSMVADIHR(iTRAQ8plex@N-term; Oxidation(M)@5);GSTNVTGDQVK(iTRAQ8plex@N-term; iTRAQ8plex(K)@11);QAGIAQLYGIAGSTNVTGDQVK(Gln->pyro-Glu@N-term; Deamidated(N)@15; iTRAQ8plex(K)@22);VVMGSSEDVQEFLEIYR(iTRAQ8plex@N-term; Oxidation(M)@3);LLYECNPIAYVM(iTRAQ8plex@N-term; Methylthio(C)@5);ANHAPFETDISTLTR(Protein Terminal Acetyl@N-term; Deami…	3.1.1.13839.1;19.1.1.9560.1;8.1.1.13077.1;19.1.1.5558.1;3.1.1.13868.1;5.1.1.14854.1;5.1.1.14785.1;2.1.1.2343.1;4.1.1.12016.1;3.1.1.13952.1;3.1.1.13665.1;5.1.1.6536.1;3.1.1.13795.1;20.1.1.9088.1;11.1.1.7260.1;5.1.1.14788.1;5.1.1.7954.1;14.1.1.5301.1;4.1.1.13628.1;5.1.1.1013.1;3.1.1.14025.1;3.1.1.13708.1;3.1.1.11141.1;17.1.1.12114.1;20.1.1.12822.1;16.1.1.4977.1;5.1.1.14898.1;5.1.1.14328.1;3.1.1.140…	GNIYSLNEGYAK(iTRAQ8plex@N-term; Deamidated(N)@7; iTRAQ8plex(K)@12);YVGSMVADIHR(iTRAQ8plex@N-term; Oxidation(M)@5);GSTNVTGDQVK(iTRAQ8plex@N-term; iTRAQ8plex(K)@11);QAGIAQLYGIAGSTNVTGDQVK(Gln->pyro-Glu@N-term; Deamidated(N)@15; iTRAQ8plex(K)@22);VVMGSSEDVQEFLEIYR(iTRAQ8plex@N-term; Oxidation(M)@3);LLYECNPIAYVM(iTRAQ8plex@N-term; Methylthio(C)@5);DFDPAINEYLQR(iTRAQ8plex@N-term; Deamidated(N)@7);ANHA…	32	121	32	KLDILSNDLVINMLK(iTRAQ8plex@N-term; iTRAQ8plex(K)@1; Deamidated(N)@7; iTRAQ8plex(K)@15);QAGIAQLYGIAGSTNVTGDQVK(Gln->pyro-Glu@N-term; Deamidated(N)@15; iTRAQ8plex(K)@22);DFDPAINEYLQR(iTRAQ8plex@N-term; Deamidated(N)@7);HAPFETDISTLTR(Delta:H(2)C(2)@N-term);YVGSMVADIHR(iTRAQ8plex@N-term);NPIAYVMEK(iTRAQ8plex@N-term; iTRAQ8plex(K)@9);APVVMGSSEDVQEFLEIYR(iTRAQ8plex@N-term; Oxidation(M)@5);DFDPAINEYLQR(…	11.1.1.14603.1;9.1.1.14012.1;9.1.1.12846.1;8.1.1.5881.1;7.1.1.12409.1;8.1.1.14533.1;8.1.1.14575.1;2.1.1.10609.1;11.1.1.8100.1;8.1.1.14338.1;8.1.1.14448.1;12.1.1.7130.1;8.1.1.14634.1;8.1.1.14401.1;13.1.1.11314.1;8.1.1.13783.1;2.1.1.12074.1;20.1.1.3985.1;3.1.1.11017.1;8.1.1.14445.1;1.1.1.6098.1;3.1.1.11955.1;10.1.1.14661.1;9.1.1.8083.1;11.1.1.13211.1;8.1.1.13653.1;9.1.1.13778.1;9.1.1.13931.1;3.1.1.…	HAPFETDISTLTR(No iTRAQ8plex@N-term);QAGIAQLYGIAGSTNVTGDQVK(No iTRAQ8plex@N-term; iTRAQ8plex(K)@22);KLDILSNDLVINMLK(iTRAQ8plex@N-term; iTRAQ8plex(K)@1; Deamidated(N)@7; iTRAQ8plex(K)@15);LDILSNDLVINMLK(iTRAQ8plex@N-term; iTRAQ8plex(K)@14);QAGIAQLYGIAGSTNVTGDQVK(Gln->pyro-Glu@N-term; Deamidated(N)@15; iTRAQ8plex(K)@22);APVVMGSSEDVQEFLEIYRK(iTRAQ8plex@N-term; Oxidation(M)@5; iTRAQ8plex(K)@20);DFDPAI…	41	134	41	AQGTGELTQLLNSLCTAIK(iTRAQ8plex@N-term; Deamidated(N)@12; Methylthio(C)@15; iTRAQ8plex(K)@19);YVGSMVADIHR(iTRAQ8plex@N-term; Oxidation(M)@5);QAGIAQLYGIAGSTNVTGDQVK(Gln->pyro-Glu@N-term; Deamidated(N)@15; iTRAQ8plex(K)@22);ANHAPFETDISTLTR(Protein Terminal Acetyl@N-term; Deamidated(N)@2);DFDPAINEYLQR(iTRAQ8plex@N-term; Deamidated(N)@7);YVGSMVADIHR(iTRAQ8plex@N-term);GNIYSLNEGYAKDFDPAINEYLQR(iTRAQ8pl…	10.1.1.13376.1;3.1.1.14648.1;8.1.1.8050.1;8.1.1.13032.1;3.1.1.14521.1;8.1.1.6577.1;1.1.1.6797.1;5.1.1.15205.1;18.1.1.12210.1;5.1.1.11170.1;10.1.1.13400.1;3.1.1.14584.1;19.1.1.6110.1;9.1.1.8672.1;5.1.1.10767.1;20.1.1.13245.1;14.1.1.4265.1;17.1.1.13413.1;1.1.1.6496.1;9.1.1.10928.1;5.1.1.11271.1;8.1.1.6512.1;4.1.1.12222.1;20.1.1.12794.1;10.1.1.9044.1;5.1.1.10534.1;3.1.1.12065.1;5.1.1.15318.1;3.1.1.1…	AQGTGELTQLLNSLCTAIK(iTRAQ8plex@N-term; Deamidated(N)@12; Methylthio(C)@15; iTRAQ8plex(K)@19);YVGSMVADIHR(iTRAQ8plex@N-term; Oxidation(M)@5);QAGIAQLYGIAGSTNVTGDQVK(Gln->pyro-Glu@N-term; Deamidated(N)@15; iTRAQ8plex(K)@22);DFDPAINEYLQR(iTRAQ8plex@N-term; Deamidated(N)@7);ANHAPFETDISTLTR(Protein Terminal Acetyl@N-term; Deamidated(N)@2);YVGSMVADIHR(iTRAQ8plex@N-term);APVVMGSSEDVQEFLEIYR(iTRAQ8plex@N-…	0.0395196	0.889905	0.0246386	0.0130724	0.174971	0.0947221	0.636796	0.895365	0.928966	0.711214	1.01859	0.685488	0.654636	0.928966	0.981748	0.691831	1.04713
169	54.59	53.88	sp|Q9CZ13|QCR1_MOUSE	Cytochrome b-c1 complex subunit 1, mitochondrial OS=Mus musculus OX=10090 GN=Uqcrc1 PE=1 SV=2	Q9CZ13	Uqcrc1	MOUSE	52.8513	-0.196667	5.81	56.04	59	sp|Q9CZ13|QCR1_MOUSE;tr|Q3THM1|Q3THM1_MOUSE;tr|Q3TIC8|Q3TIC8_MOUSE	MAASAVCRAACSGTQVLLRTRRSPALLRLPALRGTATFAQALQSVPETQVSILDNGLRVASEQSSHATCTVGVWIDAGSRYETEKNNGAGYFLEHLAFKGTKNRPGNALEKEVESIGAHLNAYSTREHTAYLIKALSKDLPKVVELLADIVQNSSLEDSQIEKERDVILREMQENDASMQNVVFDYLHATAFQGTPLAQAVEGPSENVRRLSRTDLTDYLNRHYKAPRMVLAAAGGVEHQQLLDLAQKHLSSVSRVYEEDAVPGLTPCRFTGSEIRHRDDALPLAHVAIAVEGPGWANPDNVTLQVANAIIGHYDCTYGGGVHLSSPLASVAVANKLCQSFQTFNISYSDTGLLGAHFVCDAMSIDDMVFFLQGQWMRLCTSATESEVTRGKNILRNAL…	59	112	59	EMQENDASMQNVVFDYLHATAFQGTPLAQAVEGPSENVR(iTRAQ8plex@N-term);TATFAQALQSVPETQVSILDNGLR(iTRAQ8plex@N-term; Deamidated(N)@21);NALVSHLDGTTPVCEDIGR(iTRAQ8plex@N-term; Phospho(T)@10; No Methylthio(C)@14);EMQENDASMQNVVFDYLHATAFQGTPLAQAVEGPSENVR(iTRAQ8plex@N-term; iTRAQ8plex(Y)@16);IQEVDAQMLR(iTRAQ8plex@N-term; Deamidated(Q)@2);TDLTDYLNR(No iTRAQ8plex@N-term);EMQENDASMQNVVFDYLHATAFQGTPLAQAVEGPSENVR(iTRAQ8p…	5.1.1.7360.1;10.1.1.11680.1;14.1.1.12758.1;13.1.1.3376.1;2.1.1.9859.1;18.1.1.14084.1;12.1.1.12997.1;9.1.1.12533.1;7.1.1.12700.1;13.1.1.12517.1;8.1.1.13078.1;8.1.1.6833.1;9.1.1.11870.1;12.1.1.12873.1;8.1.1.13360.1;14.1.1.13040.1;12.1.1.11079.1;12.1.1.12628.1;12.1.1.12412.1;9.1.1.9679.1;18.1.1.10473.1;18.1.1.10184.1;12.1.1.12903.1;3.1.1.2694.1;8.1.1.13192.1;12.1.1.12704.1;20.1.1.10633.1;15.1.1.9729…	EMQENDASMQNVVFDYLHATAFQGTPLAQAVEGPSENVR(iTRAQ8plex@N-term);EMQENDASMQNVVFDYLHATAFQGTPLAQAVEGPSENVR(iTRAQ8plex@N-term; iTRAQ8plex(Y)@16);TATFAQALQSVPETQVSILDNGLR(iTRAQ8plex@N-term; Deamidated(N)@21);NALVSHLDGTTPVCEDIGR(iTRAQ8plex@N-term; Phospho(T)@10; No Methylthio(C)@14);IQEVDAQMLR(iTRAQ8plex@N-term; Deamidated(Q)@2);TDLTDYLNR(No iTRAQ8plex@N-term);EMQENDASMQNVVFDYLHATAFQGTPLAQAVEGPSENVR(iTRAQ8p…	43	82	43	ALVSHLDGTTPVCEDIGR(iTRAQ8plex@N-term; Methylthio(C)@13);EMQENDASMQNVVFDYLHATAFQGTPLAQAVEGPSENVR(iTRAQ8plex@N-term);TATFAQALQSVPETQVSILDNGLR(iTRAQ8plex@N-term; Deamidated(N)@21);NALVSHLDGTTPVCEDIGR(iTRAQ8plex@N-term; Phospho(T)@10; No Methylthio(C)@14);EMQENDASMQNVVFDYLHATAFQGTPLAQAVEGPSENVR(iTRAQ8plex@N-term; iTRAQ8plex(Y)@16);IQEVDAQMLR(iTRAQ8plex@N-term; Deamidated(Q)@2);EMQENDASMQNVVFDYLHATAFQ…	14.1.1.11546.1;4.1.1.11487.1;12.1.1.13245.1;2.1.1.8190.1;11.1.1.13159.1;14.1.1.13110.1;14.1.1.12611.1;9.1.1.9316.1;20.1.1.14455.1;14.1.1.11759.1;16.1.1.3834.1;19.1.1.10379.1;10.1.1.9838.1;10.1.1.13355.1;6.1.1.11891.1;2.1.1.11018.1;6.1.1.12037.1;11.1.1.9949.1;8.1.1.9418.1;2.1.1.10205.1;14.1.1.11790.1;7.1.1.10072.1;10.1.1.12601.1;6.1.1.10812.1;12.1.1.12501.1;11.1.1.13236.1;14.1.1.12817.1;2.1.1.7971…	ALVSHLDGTTPVCEDIGR(iTRAQ8plex@N-term; Methylthio(C)@13);EMQENDASMQNVVFDYLHATAFQGTPLAQAVEGPSENVR(iTRAQ8plex@N-term);EMQENDASMQNVVFDYLHATAFQGTPLAQAVEGPSENVR(iTRAQ8plex@N-term; iTRAQ8plex(Y)@16);TATFAQALQSVPETQVSILDNGLR(iTRAQ8plex@N-term; Deamidated(N)@21);NALVSHLDGTTPVCEDIGR(iTRAQ8plex@N-term; Phospho(T)@10; No Methylthio(C)@14);IQEVDAQMLR(iTRAQ8plex@N-term; Deamidated(Q)@2);EMQENDASMQNVVFDYLHATAFQ…	46	116	46	ALVSHLDGTTPVCEDIGR(iTRAQ8plex@N-term; Methylthio(C)@13);EMQENDASMQNVVFDYLHATAFQGTPLAQAVEGPSENVR(iTRAQ8plex@N-term);TATFAQALQSVPETQVSILDNGLR(iTRAQ8plex@N-term; Deamidated(N)@21);NALVSHLDGTTPVCEDIGR(iTRAQ8plex@N-term; Phospho(T)@10; No Methylthio(C)@14);EMQENDASMQNVVFDYLHATAFQGTPLAQAVEGPSENVR(iTRAQ8plex@N-term; iTRAQ8plex(Y)@16);TDLTDYLNR(No iTRAQ8plex@N-term);IQEVDAQMLR(iTRAQ8plex@N-term; Deamidat…	17.1.1.13122.1;14.1.1.13068.1;12.1.1.12946.1;9.1.1.9760.1;1.1.1.11327.1;18.1.1.8923.1;12.1.1.6667.1;5.1.1.13847.1;14.1.1.13010.1;10.1.1.13392.1;16.1.1.10281.1;9.1.1.8125.1;6.1.1.8784.1;14.1.1.11924.1;8.1.1.7458.1;14.1.1.13138.1;9.1.1.9884.1;4.1.1.13818.1;4.1.1.11123.1;19.1.1.10756.1;12.1.1.12716.1;13.1.1.13017.1;19.1.1.11644.1;14.1.1.11797.1;6.1.1.11803.1;19.1.1.11519.1;6.1.1.11539.1;12.1.1.12980…	ALVSHLDGTTPVCEDIGR(iTRAQ8plex@N-term; Methylthio(C)@13);EMQENDASMQNVVFDYLHATAFQGTPLAQAVEGPSENVR(iTRAQ8plex@N-term);EMQENDASMQNVVFDYLHATAFQGTPLAQAVEGPSENVR(iTRAQ8plex@N-term; iTRAQ8plex(Y)@16);TATFAQALQSVPETQVSILDNGLR(iTRAQ8plex@N-term; Deamidated(N)@21);NALVSHLDGTTPVCEDIGR(iTRAQ8plex@N-term; Phospho(T)@10; No Methylthio(C)@14);IQEVDAQMLR(iTRAQ8plex@N-term; Deamidated(Q)@2);TDLTDYLNR(No iTRAQ8plex…	0.030533	0.567259	0.024754	0.0317182	0.314494	0.0740407	0.625173	0.887156	1	0.691831	1.11686	0.613762	0.698232	0.937562	0.972747	0.717794	1.02802
175	66.88	65.76	sp|Q9R0H0|ACOX1_MOUSE	Peroxisomal acyl-coenzyme A oxidase 1 OS=Mus musculus OX=10090 GN=Acox1 PE=1 SV=5	Q9R0H0	Acox1	MOUSE	74.6482	-0.277458	8.64	55.67	57	sp|Q9R0H0|ACOX1_MOUSE	MNPDLRKERAAATFNPELITHILDGSPENTRRRREIENLILNDPDFQHEDYNFLTRSQRYEVAVKKSATMVKKMREFGIADPEEIMWFKKLHMVNFVEPVGLNYSMFIPTLLNQGTTAQQEKWMHPSQELQIIGTYAQTEMGHGTHLRGLETTATYDPKTQEFILNSPTVTSIKWWPGGLGKTSNHAIVLAQLITRGECYGLHAFVVPIREIGTHKPLPGITVGDIGPKFGYEEMDNGYLKMDNYRIPRENMLMKYAQVKPDGTYVKPLSNKLTYGTMVFVRSFLVGSAAQSLSKACTIAIRYSAVRRQSEIKRSEPEPQILDFQTQQYKLFPLLATAYAFHFLGRYIKETYMRINESIGQGDLSELPELHALTAGLKAFTTWTANAGIEECRMACGGH…	57	108	14	FGYEEMDNGYLK(iTRAQ8plex@N-term; Oxidation(M)@6; Deamidated(N)@8; iTRAQ8plex(K)@12);EIENLILNDPDFQHEDYNFLTR(iTRAQ8plex@N-term; Deamidated(N)@8);EIENLILNDPDFQHED(iTRAQ8plex@N-term);GGDFLEGNIITGAQMSQVN(iTRAQ8plex@N-term);RSEPEPQILDFQTQQYK(iTRAQ8plex@N-term; iTRAQ8plex(K)@17);AVWPTLVDINSLDSLTEAYK(iTRAQ8plex@N-term; iTRAQ8plex(K)@20);AFTTWTANAGIEECR(iTRAQ8plex@N-term; Deamidated(N)@8; Methylthio(C)@14)…	6.1.1.12067.1;9.1.1.4259.1;2.1.1.12424.1;2.1.1.13339.1;1.1.1.12154.1;9.1.1.8750.1;19.1.1.13132.1;8.1.1.10315.1;1.1.1.12789.1;5.1.1.14116.1;5.1.1.13445.1;3.1.1.12091.1;20.1.1.13114.1;16.1.1.7416.1;3.1.1.9007.1;5.1.1.13598.1;10.1.1.12997.1;2.1.1.11837.1;5.1.1.12738.1;9.1.1.12352.1;7.1.1.10731.1;6.1.1.11056.1;20.1.1.13333.1;5.1.1.11325.1;2.1.1.8966.1;14.1.1.11842.1;1.1.1.12179.1;9.1.1.12579.1;8.1.1.…	EFGIADPEEIMWFK(iTRAQ8plex@N-term; iTRAQ8plex(K)@14);MREFGIADPEEIMWFK(iTRAQ8plex@N-term; iTRAQ8plex(K)@16);EIENLILNDPDFQHEDYNFLTR(iTRAQ8plex@N-term; Deamidated(N)@8);EIENLILNDPDFQHED(iTRAQ8plex@N-term);LILNDPDFQHEDYNFLTR(iTRAQ8plex@N-term);LHMVNFVEPVGLNYSMFIPTLLNQGTTAQQEK(iTRAQ8plex@N-term; Oxidation(M)@16; iTRAQ8plex(K)@32);EIENLILNDPDFQHEDYNFLTR(iTRAQ8plex@N-term);EFGIADPEEIMWFK(Glu->pyro-Glu@N-…	49	84	49	EIENLILNDPDFQHEDYNFLTR(iTRAQ8plex@N-term; Deamidated(N)@8);LVEIAAK(iTRAQ8plex@N-term; iTRAQ8plex(K)@7);GGDFLEGNIITGAQMSQVN(iTRAQ8plex@N-term);LHMVNFVEPVGLNYSMFIPTLLNQGTTAQQEK(iTRAQ8plex@N-term; Oxidation(M)@3; iTRAQ8plex(K)@32);AFTTWTANAGIEECR(iTRAQ8plex@N-term; Deamidated(N)@8; Methylthio(C)@14);FGYEEMDNGYLKMDNYR(iTRAQ8plex@N-term; Deamidated(N)@8; iTRAQ8plex(K)@12);LVGGMVSYLNDLPSQR(iTRAQ8plex@N…	12.1.1.8673.1;12.1.1.8821.1;7.1.1.13515.1;20.1.1.13472.1;5.1.1.12701.1;6.1.1.14035.1;4.1.1.12502.1;10.1.1.3482.1;1.1.1.12967.1;6.1.1.13630.1;8.1.1.13442.1;19.1.1.10291.1;8.1.1.10343.1;9.1.1.9599.1;19.1.1.10396.1;6.1.1.10388.1;9.1.1.12447.1;19.1.1.10359.1;10.1.1.11413.1;7.1.1.13897.1;13.1.1.10006.1;13.1.1.9996.1;4.1.1.11342.1;12.1.1.10159.1;1.1.1.12934.1;20.1.1.13363.1;11.1.1.10699.1;17.1.1.10909.…	LVEIAAK(iTRAQ8plex@N-term; iTRAQ8plex(K)@7);EIENLILNDPDFQHEDYNFLTR(iTRAQ8plex@N-term; Deamidated(N)@8);GGDFLEGNIITGAQMSQVN(iTRAQ8plex@N-term);LHMVNFVEPVGLNYSMFIPTLLNQGTTAQQEK(iTRAQ8plex@N-term; Oxidation(M)@3; iTRAQ8plex(K)@32);AFTTWTANAGIEECR(iTRAQ8plex@N-term; Deamidated(N)@8; Methylthio(C)@14);FGYEEMDNGYLKMDNYR(iTRAQ8plex@N-term; Deamidated(N)@8; iTRAQ8plex(K)@12);LVGGMVSYLNDLPSQR(iTRAQ8plex@N…	58	149	15	FGYEEMDNGYLK(iTRAQ8plex@N-term; Oxidation(M)@6; Deamidated(N)@8; iTRAQ8plex(K)@12);AAATFNPELITHILD(iTRAQ8plex@N-term);GGDFLEGNIITGAQMSQVN(iTRAQ8plex@N-term);EIENLILNDPDFQHED(iTRAQ8plex@N-term);AVWPTLVDINSLDSLTEAYK(iTRAQ8plex@N-term; iTRAQ8plex(K)@20);AFTTWTANAGIEECR(iTRAQ8plex@N-term; Deamidated(N)@8; Methylthio(C)@14);AVWPTLVDINSLDSLTEAYKLR(iTRAQ8plex@N-term; Deamidated(N)@10; iTRAQ8plex(K)@20);…	16.1.1.2876.1;16.1.1.1786.1;12.1.1.10215.1;13.1.1.12142.1;17.1.1.10110.1;16.1.1.13204.1;1.1.1.14685.1;19.1.1.14194.1;2.1.1.13933.1;17.1.1.2074.1;5.1.1.686.1;14.1.1.11788.1;11.1.1.10195.1;17.1.1.13369.1;7.1.1.7642.1;10.1.1.12767.1;2.1.1.13613.1;12.1.1.12418.1;6.1.1.14041.1;15.1.1.11586.1;10.1.1.12116.1;20.1.1.12006.1;2.1.1.13647.1;10.1.1.7773.1;11.1.1.13620.1;10.1.1.13591.1;4.1.1.9929.1;13.1.1.879…	GGDFLEGNIITGAQMSQVNSR(iTRAQ8plex@N-term; Deamidated(N)@19);ILELLTVTRPN(iTRAQ8plex@N-term);GGDFLEGNIITGAQMSQVN(iTRAQ8plex@N-term);LTSVDLVR(iTRAQ8plex@N-term);GGDFLEGNIITGAQMSQVNSR(iTRAQ8plex@N-term; Oxidation(M)@15);YDGNVYENLFEWAK(iTRAQ8plex@N-term; iTRAQ8plex(K)@14);YDGNVYENLFEWAK(iTRAQ8plex@N-term; Deamidated(N)@8; iTRAQ8plex(K)@14);SKEVAWNLTSVDLVR(iTRAQ8plex@N-term; iTRAQ8plex(K)@2);EVAWNLTSVDL…	0.0205779	0.00408387	0.175803	0.469629	0.117218	0.497478	1.58489	1.36773	1.65959	1.19124	1.23595	0.963829	1.52757	1.22462	1.45881	1.27057	1.20226
199	60.17	59.29	sp|P52480|KPYM_MOUSE	Pyruvate kinase PKM OS=Mus musculus OX=10090 GN=Pkm PE=1 SV=4	P52480	Pkm	MOUSE	57.8444	-0.0919021	7.17	53.67	36	sp|P52480|KPYM_MOUSE	MPKPHSEAGTAFIQTQQLHAAMADTFLEHMCRLDIDSAPITARNTGIICTIGPASRSVEMLKEMIKSGMNVARLNFSHGTHEYHAETIKNVREATESFASDPILYRPVAVALDTKGPEIRTGLIKGSGTAEVELKKGATLKITLDNAYMEKCDENILWLDYKNICKVVEVGSKIYVDDGLISLQVKEKGADFLVTEVENGGSLGSKKGVNLPGAAVDLPAVSEKDIQDLKFGVEQDVDMVFASFIRKAADVHEVRKVLGEKGKNIKIISKIENHEGVRRFDEILEASDGIMVARGDLGIEIPAEKVFLAQKMMIGRCNRAGKPVICATQMLESMIKKPRPTRAEGSDVANAVLDGADCIMLSGETAKGDYPLEAVRMQHLIAREAEAAIYHLQLFEELR…	36	95	33	LDIDSAPITAR(No iTRAQ8plex@N-term);RFDEILEASDGIMVAR(iTRAQ8plex@N-term);RFDEILEASDGIMVAR(iTRAQ8plex@N-term; Oxidation(M)@13);GDLGIEIPAEK(iTRAQ8plex@N-term; iTRAQ8plex(K)@11);FGVEQDVDMVFASFIR(iTRAQ8plex@N-term);AWAEDVDLR(iTRAQ8plex@N-term);EATESFASDPILYRPVAVALDTK(iTRAQ8plex@N-term; iTRAQ8plex(K)@23);AEGSDVANAVLDGADCIMLSGETAK(iTRAQ8plex@N-term; Methylthio(C)@16; iTRAQ8plex(K)@25);LDIDSAPITAR(iTRAQ8pl…	14.1.1.12606.1;2.1.1.13250.1;19.1.1.8982.1;13.1.1.12721.1;15.1.1.6440.1;14.1.1.12088.1;7.1.1.12183.1;14.1.1.12731.1;15.1.1.12946.1;14.1.1.12906.1;7.1.1.11283.1;13.1.1.12798.1;13.1.1.12685.1;12.1.1.12211.1;13.1.1.12891.1;13.1.1.12574.1;3.1.1.12750.1;20.1.1.13428.1;7.1.1.11449.1;14.1.1.12875.1;5.1.1.14853.1;13.1.1.12652.1;14.1.1.12652.1;11.1.1.11488.1;5.1.1.12419.1;13.1.1.12759.1;9.1.1.12470.1;2.1.…	LDIDSAPITAR(No iTRAQ8plex@N-term);RFDEILEASDGIMVAR(iTRAQ8plex@N-term);RFDEILEASDGIMVAR(iTRAQ8plex@N-term; Oxidation(M)@13);FGVEQDVDMVFASFIR(iTRAQ8plex@N-term);AWAEDVDLR(iTRAQ8plex@N-term);EATESFASDPILYRPVAVALDTK(iTRAQ8plex@N-term; iTRAQ8plex(K)@23);AEGSDVANAVLDGADCIMLSGETAK(iTRAQ8plex@N-term; Methylthio(C)@16; iTRAQ8plex(K)@25);LDIDSAPITAR(iTRAQ8plex@N-term);AEGSDVANAVLDGADCIMLSGETAKGDYPLEAVR(iTR…	23	71	22	RFDEILEASDGIMVAR(iTRAQ8plex@N-term);FGVEQDVDMVFASFIR(iTRAQ8plex@N-term);IISKIENHEGVR(iTRAQ8plex@N-term; iTRAQ8plex(K)@4);AEGSDVANAVLDGADCIMLSGETAK(iTRAQ8plex@N-term; Methylthio(C)@16; iTRAQ8plex(K)@25);AEGSDVANAVLDGADCIMLSGETAKGDYPLEAVR(iTRAQ8plex@N-term; Methylthio(C)@16; iTRAQ8plex(K)@25);GADFLVTEVENGGSLGSK(iTRAQ8plex@N-term; Deamidated(N)@11; iTRAQ8plex(K)@18);GIFPVLCK(iTRAQ8plex@N-term; Methy…	15.1.1.9058.1;15.1.1.13142.1;7.1.1.11582.1;10.1.1.12936.1;14.1.1.9261.1;10.1.1.12001.1;16.1.1.12855.1;9.1.1.11528.1;6.1.1.14611.1;15.1.1.13422.1;15.1.1.13324.1;13.1.1.9940.1;8.1.1.13192.1;8.1.1.14731.1;1.1.1.9142.1;15.1.1.13457.1;15.1.1.13169.1;15.1.1.13388.1;2.1.1.14346.1;15.1.1.13111.1;11.1.1.11940.1;7.1.1.7955.1;20.1.1.9318.1;14.1.1.12239.1;3.1.1.13113.1;15.1.1.13533.1;14.1.1.12266.1;8.1.1.145…	RFDEILEASDGIMVAR(iTRAQ8plex@N-term);FGVEQDVDMVFASFIR(iTRAQ8plex@N-term);AEGSDVANAVLDGADCIMLSGETAK(iTRAQ8plex@N-term; Methylthio(C)@16; iTRAQ8plex(K)@25);IISKIENHEGVR(iTRAQ8plex@N-term; iTRAQ8plex(K)@4);AEGSDVANAVLDGADCIMLSGETAKGDYPLEAVR(iTRAQ8plex@N-term; Methylthio(C)@16; iTRAQ8plex(K)@25);GADFLVTEVENGGSLGSK(iTRAQ8plex@N-term; Deamidated(N)@11; iTRAQ8plex(K)@18);GIFPVLCK(iTRAQ8plex@N-term; Methy…	28	60	27	RFDEILEASDGIMVAR(iTRAQ8plex@N-term);GDLGIEIPAEK(iTRAQ8plex@N-term; iTRAQ8plex(K)@11);RFDEILEASDGIMVAR(iTRAQ8plex@N-term; Oxidation(M)@13);FGVEQDVDMVFASFIR(iTRAQ8plex@N-term);EATESFASDPILYRPVAVALDTK(iTRAQ8plex@N-term; iTRAQ8plex(K)@23);IISKIENHEGVR(iTRAQ8plex@N-term; iTRAQ8plex(K)@4);AEGSDVANAVLDGADCIMLSGETAK(iTRAQ8plex@N-term; Methylthio(C)@16; iTRAQ8plex(K)@25);AEGSDVANAVLDGADCIMLSGETAKGDYPLEAVR…	5.1.1.3143.1;2.1.1.14575.1;2.1.1.14287.1;19.1.1.8878.1;19.1.1.7764.1;20.1.1.8160.1;14.1.1.10526.1;15.1.1.13393.1;14.1.1.6478.1;14.1.1.6367.1;4.1.1.12436.1;2.1.1.14283.1;17.1.1.7359.1;13.1.1.10346.1;9.1.1.2051.1;12.1.1.1778.1;15.1.1.13383.1;10.1.1.12039.1;16.1.1.13724.1;10.1.1.12153.1;11.1.1.8122.1;13.1.1.13205.1;20.1.1.1473.1;14.1.1.9270.1;5.1.1.14876.1;12.1.1.7786.1;20.1.1.9449.1;13.1.1.13216.1;…	RFDEILEASDGIMVAR(iTRAQ8plex@N-term);RFDEILEASDGIMVAR(iTRAQ8plex@N-term; Oxidation(M)@13);FGVEQDVDMVFASFIR(iTRAQ8plex@N-term);EATESFASDPILYRPVAVALDTK(iTRAQ8plex@N-term; iTRAQ8plex(K)@23);AEGSDVANAVLDGADCIMLSGETAK(iTRAQ8plex@N-term; Methylthio(C)@16; iTRAQ8plex(K)@25);IISKIENHEGVR(iTRAQ8plex@N-term; iTRAQ8plex(K)@4);AEGSDVANAVLDGADCIMLSGETAKGDYPLEAVR(iTRAQ8plex@N-term; Methylthio(C)@16; iTRAQ8plex(…	0.0221774	0.422863	0.0875313	0.0440105	0.11395	0.100377	0.855067	1.18032	1.21339	0.717794	1.00925	0.704693	0.731139	1.25892	2.05116	0.564937	1.61436
222	23.16	23.04	sp|P35700|PRDX1_MOUSE	Peroxiredoxin-1 OS=Mus musculus OX=10090 GN=Prdx1 PE=1 SV=1	P35700	Prdx1	MOUSE	22.1763	-0.221106	8.26	51.76	22	sp|P35700|PRDX1_MOUSE;tr|B1AXW5|B1AXW5_MOUSE;tr|B1AXW6|B1AXW6_MOUSE	MSSGNAKIGYPAPNFKATAVMPDGQFKDISLSEYKGKYVVFFFYPLDFTFVCPTEIIAFSDRADEFKKLNCQVIGASVDSHFCHLAWINTPKKQGGLGPMNIPLISDPKRTIAQDYGVLKADEGISFRGLFIIDDKGILRQITINDLPVGRSVDEIIRLVQAFQFTDKHGEVCPAGWKPGSDTIKPDVNKSKEYFSKQK	22	62	21	GLFIIDDKGILRQITINDLPVGR(iTRAQ8plex@N-term; iTRAQ8plex(K)@8);QGGLGPMNIPLISDPKR(Gln->pyro-Glu@N-term; iTRAQ8plex(K)@16);IGYPAPNFK(iTRAQ8plex@N-term; iTRAQ8plex(K)@9);TIAQDYGVLKADEGISFR(iTRAQ8plex@N-term; iTRAQ8plex(K)@10);RTIAQDYGVLK(iTRAQ8plex@N-term; iTRAQ8plex(K)@11);TIAQDYGVLK(iTRAQ8plex@N-term; iTRAQ8plex(K)@10);GLGPMNIPLISDPKR(iTRAQ8plex@N-term; iTRAQ8plex(K)@14);QITINDLPVGR(Gln->pyro-Glu@N-t…	9.1.1.6435.1;6.1.1.6441.1;2.1.1.8656.1;2.1.1.8583.1;4.1.1.12000.1;16.1.1.9857.1;18.1.1.12752.1;1.1.1.9055.1;12.1.1.8784.1;2.1.1.14487.1;2.1.1.14657.1;2.1.1.14484.1;2.1.1.14636.1;2.1.1.14798.1;6.1.1.5593.1;3.1.1.13971.1;6.1.1.11198.1;15.1.1.10099.1;2.1.1.14562.1;6.1.1.7539.1;2.1.1.14219.1;3.1.1.13772.1;7.1.1.10655.1;19.1.1.5727.1;4.1.1.11877.1;2.1.1.14449.1;2.1.1.14532.1;3.1.1.13768.1;8.1.1.11302.…	GLFIIDDKGILRQITINDLPVGR(iTRAQ8plex@N-term; iTRAQ8plex(K)@8);IGYPAPNFK(iTRAQ8plex@N-term; iTRAQ8plex(K)@9);QGGLGPMNIPLISDPKR(Gln->pyro-Glu@N-term; iTRAQ8plex(K)@16);TIAQDYGVLKADEGISFR(iTRAQ8plex@N-term; iTRAQ8plex(K)@10);RTIAQDYGVLK(iTRAQ8plex@N-term; iTRAQ8plex(K)@11);TIAQDYGVLK(iTRAQ8plex@N-term; iTRAQ8plex(K)@10);GLGPMNIPLISDPKR(iTRAQ8plex@N-term; iTRAQ8plex(K)@14);QITINDLPVGR(Gln->pyro-Glu@N-t…	14	56	14	TIAQDYGVLKADEGISFR(No iTRAQ8plex@N-term; iTRAQ8plex(K)@10);QGGLGPMNIPLISDPKR(Gln->pyro-Glu@N-term; iTRAQ8plex(K)@16);TIAQDYGVLKADEGISFR(iTRAQ8plex@N-term; iTRAQ8plex(K)@10);IGYPAPNFK(iTRAQ8plex@N-term; Deamidated(N)@7; iTRAQ8plex(K)@9);QITINDLPVGR(Gln->pyro-Glu@N-term; Deamidated(N)@5);TIAQDYGVLK(iTRAQ8plex@N-term; iTRAQ8plex(K)@10);QITINDLPVGR(Gln->pyro-Glu@N-term);QITINDLPVGR(iTRAQ8plex@N-term;…	12.1.1.10980.1;6.1.1.15309.1;20.1.1.11316.1;6.1.1.9868.1;11.1.1.11424.1;1.1.1.5563.1;6.1.1.15346.1;3.1.1.7482.1;5.1.1.13192.1;6.1.1.15373.1;2.1.1.6915.1;6.1.1.14736.1;3.1.1.10723.1;5.1.1.7596.1;6.1.1.15183.1;6.1.1.14547.1;15.1.1.9255.1;6.1.1.15287.1;10.1.1.11295.1;3.1.1.8366.1;18.1.1.12112.1;6.1.1.12839.1;6.1.1.13902.1;2.1.1.10510.1;5.1.1.13159.1;6.1.1.11606.1;6.1.1.11241.1;6.1.1.9932.1;6.1.1.141…	QGGLGPMNIPLISDPKR(Gln->pyro-Glu@N-term; iTRAQ8plex(K)@16);TIAQDYGVLKADEGISFR(No iTRAQ8plex@N-term; iTRAQ8plex(K)@10);IGYPAPNFK(iTRAQ8plex@N-term; Deamidated(N)@7; iTRAQ8plex(K)@9);TIAQDYGVLKADEGISFR(iTRAQ8plex@N-term; iTRAQ8plex(K)@10);QITINDLPVGR(Gln->pyro-Glu@N-term; Deamidated(N)@5);TIAQDYGVLK(iTRAQ8plex@N-term; iTRAQ8plex(K)@10);QITINDLPVGR(Gln->pyro-Glu@N-term);QITINDLPVGR(iTRAQ8plex@N-term;…	15	100	15	TIAQDYGVLKADEGISFR(No iTRAQ8plex@N-term; iTRAQ8plex(K)@10);QGGLGPMNIPLISDPKR(Gln->pyro-Glu@N-term; iTRAQ8plex(K)@16);TIAQDYGVLKADEGISFR(iTRAQ8plex@N-term; iTRAQ8plex(K)@10);SVDEIIR(iTRAQ8plex@N-term);QITINDLPVGR(iTRAQ8plex@N-term; Deamidated(Q)@1);RTIAQDYGVLK(iTRAQ8plex@N-term; iTRAQ8plex(K)@11);TIAQDYGVLK(iTRAQ8plex@N-term; iTRAQ8plex(K)@10);GLGPMNIPLISDPKR(iTRAQ8plex@N-term; iTRAQ8plex(K)@14);K…	2.1.1.15477.1;18.1.1.5902.1;8.1.1.11781.1;2.1.1.15507.1;4.1.1.11322.1;16.1.1.8155.1;2.1.1.15197.1;3.1.1.14794.1;17.1.1.10379.1;2.1.1.15279.1;19.1.1.7924.1;5.1.1.10259.1;1.1.1.6280.1;10.1.1.8748.1;2.1.1.15374.1;6.1.1.11881.1;5.1.1.14519.1;19.1.1.5872.1;17.1.1.10093.1;3.1.1.13690.1;9.1.1.8104.1;3.1.1.14594.1;3.1.1.8216.1;10.1.1.4594.1;2.1.1.15342.1;3.1.1.14712.1;7.1.1.11373.1;2.1.1.15021.1;2.1.1.15…	SVDEIIR(iTRAQ8plex@N-term);QGGLGPMNIPLISDPKR(Gln->pyro-Glu@N-term; iTRAQ8plex(K)@16);TIAQDYGVLKADEGISFR(No iTRAQ8plex@N-term; iTRAQ8plex(K)@10);TIAQDYGVLKADEGISFR(iTRAQ8plex@N-term; iTRAQ8plex(K)@10);RTIAQDYGVLK(iTRAQ8plex@N-term; iTRAQ8plex(K)@11);QITINDLPVGR(iTRAQ8plex@N-term; Deamidated(Q)@1);TIAQDYGVLK(iTRAQ8plex@N-term; iTRAQ8plex(K)@10);GLGPMNIPLISDPKR(iTRAQ8plex@N-term; iTRAQ8plex(K)@14);K…	0.0470853	0.280297	0.902719	0.0300852	0.0557911	0.00390894	1.10662	0.83946	0.801678	1.30617	0.946237	1.38038	0.879022	0.772681	0.586138	1.14815	0.765597
305	16.66	16.29	sp|P04117|FABP4_MOUSE	Fatty acid-binding protein, adipocyte OS=Mus musculus OX=10090 GN=Fabp4 PE=1 SV=3	P04117	Fabp4	MOUSE	14.6498	-0.219697	8.53	46.97	9	sp|P04117|FABP4_MOUSE;tr|Q542H7|Q542H7_MOUSE	MCDAFVGTWKLVSSENFDDYMKEVGVGFATRKVAGMAKPNMIISVNGDLVTIRSESTFKNTEISFKLGVEFDEITADDRKVKSIITLDGGALVQVQKWDGKSTTIKRKRDGDKLVVECVMKGVTSTRVYERA	9	29	9	LVVECVMK(iTRAQ8plex@N-term; Methylthio(C)@5; iTRAQ8plex(K)@8);LGVEFDEITADDR(iTRAQ8plex@N-term);LVSSENFDDYMKEVGVGFATR(iTRAQ8plex@N-term; Deamidated(N)@6; iTRAQ8plex(K)@12);LVSSENFDDYMKEVGVGFATR(iTRAQ8plex@N-term; iTRAQ8plex(K)@12);LGVEFDEITADDRK(Delta:H(2)C(2)@N-term; iTRAQ8plex(K)@14);DGDKLVVECVMK(iTRAQ8plex@N-term; iTRAQ8plex(K)@4; Methylthio(C)@9; iTRAQ8plex(K)@12);LVSSENFDDYMK(iTRAQ8plex@N-ter…	3.1.1.8552.1;12.1.1.13053.1;8.1.1.12453.1;11.1.1.7272.1;1.1.1.9714.1;12.1.1.12857.1;12.1.1.12887.1;12.1.1.12827.1;12.1.1.12649.1;1.1.1.9706.1;12.1.1.12999.1;12.1.1.12970.1;12.1.1.12915.1;12.1.1.13031.1;8.1.1.12829.1;12.1.1.12737.1;18.1.1.10031.1;12.1.1.12795.1;4.1.1.11452.1;9.1.1.12121.1;12.1.1.12941.1;12.1.1.12494.1;11.1.1.11544.1;12.1.1.12542.1;2.1.1.8938.1;9.1.1.12074.1;13.1.1.9397.1;12.1.1.12…	LVVECVMK(iTRAQ8plex@N-term; Methylthio(C)@5; iTRAQ8plex(K)@8);LGVEFDEITADDR(iTRAQ8plex@N-term);LVSSENFDDYMKEVGVGFATR(iTRAQ8plex@N-term; Deamidated(N)@6; iTRAQ8plex(K)@12);LGVEFDEITADDRK(Delta:H(2)C(2)@N-term; iTRAQ8plex(K)@14);LVSSENFDDYMKEVGVGFATR(iTRAQ8plex@N-term; iTRAQ8plex(K)@12);DGDKLVVECVMK(iTRAQ8plex@N-term; iTRAQ8plex(K)@4; Methylthio(C)@9; iTRAQ8plex(K)@12);LVSSENFDDYMK(iTRAQ8plex@N-ter…	8	23	7	LVSSENFDDYMKEVGVGFATR(iTRAQ8plex@N-term; Deamidated(N)@6; iTRAQ8plex(K)@12);LVSSENFDDYMKEVGVGFATR(iTRAQ8plex@N-term; iTRAQ8plex(K)@12);LGVEFDEITADDRK(Delta:H(2)C(2)@N-term; iTRAQ8plex(K)@14);LVSSENFDDYMK(iTRAQ8plex@N-term; iTRAQ8plex(K)@12);DAFVGTWK(iTRAQ8plex@N-term; iTRAQ8plex(K)@8);SIITLDGGALVQVQK(iTRAQ8plex@N-term; iTRAQ8plex(K)@15);LVSSENFDDYMK(iTRAQ8plex@N-term; Deamidated(N)@6; iTRAQ8plex(…	6.1.1.10161.1;14.1.1.13105.1;11.1.1.12623.1;14.1.1.12621.1;14.1.1.12791.1;6.1.1.10297.1;8.1.1.9412.1;14.1.1.13003.1;20.1.1.10007.1;8.1.1.9621.1;12.1.1.11867.1;14.1.1.12543.1;14.1.1.12975.1;14.1.1.12890.1;14.1.1.13030.1;19.1.1.7341.1;14.1.1.12854.1;14.1.1.12689.1;14.1.1.12586.1;14.1.1.12936.1;17.1.1.8933.1;5.1.1.8559.1;14.1.1.12730.1	SIITLDGGALVQVQK(iTRAQ8plex@N-term; iTRAQ8plex(K)@15);LVSSENFDDYMK(iTRAQ8plex@N-term; Deamidated(N)@6; iTRAQ8plex(K)@12);LVSSENFDDYMK(iTRAQ8plex@N-term; Oxidation(M)@11; iTRAQ8plex(K)@12);LVSSENFDDYMKEVGVGFATR(iTRAQ8plex@N-term; Deamidated(N)@6; iTRAQ8plex(K)@12);LGVEFDEITADDRK(Delta:H(2)C(2)@N-term; iTRAQ8plex(K)@14);LVSSENFDDYMKEVGVGFATR(iTRAQ8plex@N-term; iTRAQ8plex(K)@12);LVSSENFDDYMK(iTRAQ8pl…	10	36	8	NFDDYMK(iTRAQ8plex@N-term; Deamidated(N)@1; iTRAQ8plex(K)@7);LGVEFDEITADDR(iTRAQ8plex@N-term);LVSSENFDDYMKEVGVGFATR(iTRAQ8plex@N-term; Deamidated(N)@6; iTRAQ8plex(K)@12);EVGVGFATR(iTRAQ8plex@N-term);LVSSENFDDYMKEVGVGFATR(iTRAQ8plex@N-term; iTRAQ8plex(K)@12);LGVEFDEITADDRK(Delta:H(2)C(2)@N-term; iTRAQ8plex(K)@14);LVSSENFDDYMKEVGVGFATR(iTRAQ8plex@N-term; Oxidation(M)@11; iTRAQ8plex(K)@12);DAFVGTWK(…	2.1.1.8110.1;12.1.1.12051.1;12.1.1.13604.1;12.1.1.13564.1;14.1.1.12995.1;5.1.1.13950.1;1.1.1.4392.1;14.1.1.9704.1;14.1.1.12951.1;6.1.1.7113.1;16.1.1.9346.1;15.1.1.10476.1;5.1.1.12342.1;13.1.1.11765.1;14.1.1.13043.1;14.1.1.13141.1;3.1.1.11375.1;3.1.1.9098.1;14.1.1.12805.1;8.1.1.13094.1;14.1.1.12759.1;13.1.1.10257.1;12.1.1.13585.1;12.1.1.13552.1;8.1.1.9676.1;10.1.1.11004.1;14.1.1.12837.1;12.1.1.136…	LGVEFDEITADDR(iTRAQ8plex@N-term);EVGVGFATR(iTRAQ8plex@N-term);LVSSENFDDYMKEVGVGFATR(iTRAQ8plex@N-term; Deamidated(N)@6; iTRAQ8plex(K)@12);LGVEFDEITADDRK(Delta:H(2)C(2)@N-term; iTRAQ8plex(K)@14);LVSSENFDDYMKEVGVGFATR(iTRAQ8plex@N-term; iTRAQ8plex(K)@12);LVSSENFDDYMKEVGVGFATR(iTRAQ8plex@N-term; Oxidation(M)@11; iTRAQ8plex(K)@12);LVSSENFDDYMK(iTRAQ8plex@N-term; iTRAQ8plex(K)@12);SIITLDGGALVQVQK(iTRA…	0.0104462	0.101636	0.0352427	0.0121731	0.461019	0.955784	1.13763	1.45881	1.2942	0.772681	0.879022	0.870964	1.0666	1.2942	1.09648	0.816582	0.847227
325	23.89	23.44	sp|Q91XE0|GLYAT_MOUSE	Glycine N-acyltransferase OS=Mus musculus OX=10090 GN=Glyat PE=1 SV=1	Q91XE0	Glyat	MOUSE	34.0981	-0.419932	8.46	46.28	15	sp|Q91XE0|GLYAT_MOUSE	MIVPLQGAQMLQMLEKSLRKYLPESLKVYGTVYHMIHGNPFNLKALVDKWPDFNTVVVRPQEQEMTDDLDFYINTYQVYSKDPQNCQEFLESSEVINWKQHLQIQSSQSHLNKTIQNLASIQSFQIKHSENILYVSSETIKKLFPSLLDTKNLSTGSGKPKAIDQDKFKLSSLDVVHAALVNKFWLFGGNERSQRFIERCIKNFPSSCVLGPEGTPASWTLMDQTGEMRMGGTMPEYRLQGLVSFVVHSQDQIMTKRGYPVYSHTEKSNIAMQKMSYTLQHLPMPCAWNQWKCMPM	12	20	12	MIVPLQGAQMLQMLEK(iTRAQ8plex@N-term; iTRAQ8plex(K)@16);KLFPSLLDTK(iTRAQ8plex@N-term; iTRAQ8plex(K)@1; iTRAQ8plex(K)@10);LQGLVSFVVHSQDQIMTK(iTRAQ8plex@N-term; Oxidation(M)@16; iTRAQ8plex(K)@18);GYPVYSHTEK(iTRAQ8plex@N-term; iTRAQ8plex(K)@10);LQGLVSFVVHSQDQIMTKR(iTRAQ8plex@N-term; iTRAQ8plex(K)@18);KYLPESLK(iTRAQ8plex@N-term; iTRAQ8plex(K)@1; iTRAQ8plex(K)@8);NFPSSCVLGPEGTPASWTLMDQTGEMR(iTRAQ8plex@N…	14.1.1.11236.1;17.1.1.12956.1;18.1.1.13340.1;3.1.1.12820.1;13.1.1.8077.1;5.1.1.13518.1;14.1.1.11040.1;14.1.1.11146.1;4.1.1.5461.1;20.1.1.14270.1;19.1.1.12434.1;14.1.1.11282.1;14.1.1.11414.1;14.1.1.11375.1;2.1.1.13244.1;20.1.1.1025.1;19.1.1.13535.1;19.1.1.13945.1;5.1.1.13499.1;2.1.1.12489.1	MIVPLQGAQMLQMLEK(iTRAQ8plex@N-term; iTRAQ8plex(K)@16);KLFPSLLDTK(iTRAQ8plex@N-term; iTRAQ8plex(K)@1; iTRAQ8plex(K)@10);GYPVYSHTEK(iTRAQ8plex@N-term; iTRAQ8plex(K)@10);LQGLVSFVVHSQDQIMTK(iTRAQ8plex@N-term; Oxidation(M)@16; iTRAQ8plex(K)@18);KYLPESLK(iTRAQ8plex@N-term; iTRAQ8plex(K)@1; iTRAQ8plex(K)@8);LQGLVSFVVHSQDQIMTKR(iTRAQ8plex@N-term; iTRAQ8plex(K)@18);NFPSSCVLGPEGTPASWTLMDQTGEMR(iTRAQ8plex@N…	14	23	14	LQGLVSFVVHSQDQIMTK(No iTRAQ8plex@N-term; iTRAQ8plex(K)@18);MIVPLQGAQMLQMLEK(iTRAQ8plex@N-term; iTRAQ8plex(K)@16);HSENILYVSSETIK(iTRAQ8plex@N-term; iTRAQ8plex(K)@14);GYPVYSHTEK(iTRAQ8plex@N-term; iTRAQ8plex(K)@10);RGYPVYSHTEK(iTRAQ8plex@N-term; iTRAQ8plex(K)@11);KYLPESLK(iTRAQ8plex@N-term; iTRAQ8plex(K)@1; iTRAQ8plex(K)@8);LQGLVSFVVHSQDQIMTKR(iTRAQ8plex@N-term; iTRAQ8plex(K)@18);NFPSSCVLGPEGTPASWT…	8.1.1.13410.1;2.1.1.14568.1;16.1.1.859.1;15.1.1.12114.1;15.1.1.11951.1;8.1.1.13395.1;16.1.1.979.1;15.1.1.11738.1;17.1.1.1074.1;2.1.1.14557.1;19.1.1.6837.1;7.1.1.5525.1;1.1.1.557.1;2.1.1.1128.1;7.1.1.3321.1;19.1.1.13678.1;15.1.1.12067.1;20.1.1.13689.1;4.1.1.13188.1;20.1.1.12694.1;18.1.1.11848.1;8.1.1.13507.1;15.1.1.11919.1	LQGLVSFVVHSQDQIMTK(No iTRAQ8plex@N-term; iTRAQ8plex(K)@18);MIVPLQGAQMLQMLEK(iTRAQ8plex@N-term; iTRAQ8plex(K)@16);GYPVYSHTEK(iTRAQ8plex@N-term; iTRAQ8plex(K)@10);HSENILYVSSETIK(iTRAQ8plex@N-term; iTRAQ8plex(K)@14);KYLPESLK(iTRAQ8plex@N-term; iTRAQ8plex(K)@1; iTRAQ8plex(K)@8);LQGLVSFVVHSQDQIMTKR(iTRAQ8plex@N-term; iTRAQ8plex(K)@18);RGYPVYSHTEK(iTRAQ8plex@N-term; iTRAQ8plex(K)@11);MGGTMPEYR(iTRAQ8pl…	15	27	15	LFPSLLDTK(iTRAQ8plex@N-term; iTRAQ8plex(K)@9);MIVPLQGAQMLQMLEK(iTRAQ8plex@N-term; iTRAQ8plex(K)@16);KLFPSLLDTK(iTRAQ8plex@N-term; iTRAQ8plex(K)@1; iTRAQ8plex(K)@10);LQGLVSFVVHSQDQIMTK(iTRAQ8plex@N-term; Oxidation(M)@16; iTRAQ8plex(K)@18);HSENILYVSSETIK(iTRAQ8plex@N-term; iTRAQ8plex(K)@14);GYPVYSHTEK(iTRAQ8plex@N-term; iTRAQ8plex(K)@10);RGYPVYSHTEK(iTRAQ8plex@N-term; iTRAQ8plex(K)@11);NFPSSCVLGPEG…	19.1.1.14049.1;1.1.1.621.1;1.1.1.15424.1;14.1.1.11652.1;20.1.1.1200.1;16.1.1.902.1;14.1.1.11775.1;8.1.1.13519.1;16.1.1.11670.1;15.1.1.12550.1;20.1.1.14244.1;20.1.1.14254.1;15.1.1.12497.1;14.1.1.11577.1;6.1.1.13542.1;18.1.1.14315.1;16.1.1.13067.1;20.1.1.14473.1;16.1.1.9362.1;19.1.1.6875.1;18.1.1.501.1;20.1.1.12953.1;1.1.1.14002.1;20.1.1.12990.1;5.1.1.14261.1;17.1.1.9108.1;19.1.1.12969.1	LFPSLLDTK(iTRAQ8plex@N-term; iTRAQ8plex(K)@9);MIVPLQGAQMLQMLEK(iTRAQ8plex@N-term; iTRAQ8plex(K)@16);KLFPSLLDTK(iTRAQ8plex@N-term; iTRAQ8plex(K)@1; iTRAQ8plex(K)@10);GYPVYSHTEK(iTRAQ8plex@N-term; iTRAQ8plex(K)@10);LQGLVSFVVHSQDQIMTK(iTRAQ8plex@N-term; Oxidation(M)@16; iTRAQ8plex(K)@18);HSENILYVSSETIK(iTRAQ8plex@N-term; iTRAQ8plex(K)@14);RGYPVYSHTEK(iTRAQ8plex@N-term; iTRAQ8plex(K)@11);NFPSSCVLGPEG…	0.0254564	0.0548811	0.247503	0.0462093	0.0428655	0.007849	0.847227	1.31826	1.65959	0.648634	1.28233	0.505825	0.613762	1.1695	1.55597	0.524808	1.31826
386	19.62	18.86	sp|Q64105|SPRE_MOUSE	Sepiapterin reductase OS=Mus musculus OX=10090 GN=Spr PE=1 SV=1	Q64105	Spr	MOUSE	27.8827	-0.00804598	5.56	43.68	22	sp|Q64105|SPRE_MOUSE;tr|G3UXX3|G3UXX3_MOUSE;tr|Q91XH5|Q91XH5_MOUSE	MEADGLGCAVCVLTGASRGFGRALAPQLARLLSPGSVMLVSARSESMLRQLKEELGAQQPDLKVVLAAADLGTEAGVQRLLSAVRELPRPEGLQRLLLINNAATLGDVSKGFLNVNDLAEVNNYWALNLTSMLCLTSGTLNAFQDSPGLSKTVVNISSLCALQPYKGWGLYCAGKAARDMLYQVLAAEEPSVRVLSYAPGPLDNDMQQLARETSKDPELRSKLQKLKSDGALVDCGTSAQKLLGLLQKDTFQSGAHVDFYD	22	41	22	VLSYAPGPLDNDMQQLAR(iTRAQ8plex@N-term; Deamidated(N)@11);VLSYAPGPLDNDMQQLAR(iTRAQ8plex@N-term; Deamidated(N)@11; Oxidation(M)@13);LLLINNAATLGDVSK(iTRAQ8plex@N-term; iTRAQ8plex(K)@15);VLSYAPGPLDNDMQQLAR(iTRAQ8plex@N-term; Amino(Y)@4);LLGLLQK(iTRAQ8plex@N-term; iTRAQ8plex(K)@7);VLSYAPGPLDNDMQQLAR(No iTRAQ8plex@N-term);LLSPGSVMLVSAR(iTRAQ8plex@N-term; Oxidation(M)@8);DMLYQVLAAEEPSVR(iTRAQ8plex@N-term…	9.1.1.11761.1;4.1.1.11686.1;1.1.1.6553.1;11.1.1.13344.1;2.1.1.11298.1;11.1.1.12376.1;6.1.1.10920.1;11.1.1.11858.1;4.1.1.14222.1;11.1.1.7308.1;20.1.1.12578.1;4.1.1.12455.1;19.1.1.10388.1;1.1.1.12557.1;4.1.1.12329.1;2.1.1.12029.1;5.1.1.10996.1;11.1.1.7276.1;5.1.1.11990.1;20.1.1.10180.1;4.1.1.12826.1;7.1.1.11077.1;17.1.1.11035.1;10.1.1.6966.1;4.1.1.11347.1;4.1.1.12057.1;19.1.1.10414.1;9.1.1.11765.1;…	VLSYAPGPLDNDMQQLAR(iTRAQ8plex@N-term; Deamidated(N)@11);LLLINNAATLGDVSK(iTRAQ8plex@N-term; iTRAQ8plex(K)@15);VLSYAPGPLDNDMQQLAR(iTRAQ8plex@N-term; Deamidated(N)@11; Oxidation(M)@13);VLSYAPGPLDNDMQQLAR(iTRAQ8plex@N-term; Amino(Y)@4);LLGLLQK(iTRAQ8plex@N-term; iTRAQ8plex(K)@7);VLSYAPGPLDNDMQQLAR(No iTRAQ8plex@N-term);DMLYQVLAAEEPSVR(iTRAQ8plex@N-term; iTRAQ8plex(Y)@4);LLSPGSVMLVSAR(iTRAQ8plex@N-ter…	11	21	11	VLSYAPGPLDNDMQQLAR(iTRAQ8plex@N-term; Deamidated(N)@11);DMLYQVLAAEEPSVR(iTRAQ8plex@N-term);ELPRPEGLQR(Glu->pyro-Glu@N-term);VVLAAADLGTEAGVQR(iTRAQ8plex@N-term);VLSYAPGPLDNDMQQLAR(iTRAQ8plex@N-term; Deamidated(N)@11; Oxidation(M)@13);LLLINNAATLGDVSK(Delta:H(2)C(2)@N-term; iTRAQ8plex(K)@15);VLSYAPGPLDNDMQQLAR(No iTRAQ8plex@N-term);LLSPGSVMLVSAR(iTRAQ8plex@N-term; Oxidation(M)@8);LLSPGSVMLVSAR(iTRAQ…	7.1.1.14166.1;6.1.1.11474.1;2.1.1.10461.1;6.1.1.13501.1;7.1.1.12987.1;7.1.1.14641.1;7.1.1.12688.1;13.1.1.4824.1;5.1.1.4765.1;6.1.1.13446.1;2.1.1.10877.1;8.1.1.12625.1;9.1.1.10459.1;6.1.1.13428.1;8.1.1.11859.1;3.1.1.12772.1;7.1.1.14609.1;20.1.1.14255.1;4.1.1.11114.1;7.1.1.12973.1;2.1.1.10847.1	VLSYAPGPLDNDMQQLAR(iTRAQ8plex@N-term; Deamidated(N)@11);DMLYQVLAAEEPSVR(iTRAQ8plex@N-term);ELPRPEGLQR(Glu->pyro-Glu@N-term);VLSYAPGPLDNDMQQLAR(iTRAQ8plex@N-term; Deamidated(N)@11; Oxidation(M)@13);VVLAAADLGTEAGVQR(iTRAQ8plex@N-term);LLLINNAATLGDVSK(Delta:H(2)C(2)@N-term; iTRAQ8plex(K)@15);VLSYAPGPLDNDMQQLAR(No iTRAQ8plex@N-term);LLSPGSVMLVSAR(iTRAQ8plex@N-term);LLSPGSVMLVSAR(iTRAQ8plex@N-term; Ox…	14	36	14	VLSYAPGPLDNDMQQLAR(iTRAQ8plex@N-term; Deamidated(N)@11);DMLYQVLAAEEPSVR(iTRAQ8plex@N-term);VVLAAADLGTEAGVQR(iTRAQ8plex@N-term);LLLINNAATLGDVSK(iTRAQ8plex@N-term; Deamidated(N)@5; iTRAQ8plex(K)@15);VVLAAADLGTEAGVQR(iTRAQ8plex@N-term; Oxidation(D)@7);QLKEELGAQQPDLK(Gln->pyro-Glu@N-term; iTRAQ8plex(K)@3; iTRAQ8plex(K)@14);VLSYAPGPLDNDMQQLAR(iTRAQ8plex@N-term; Oxidation(M)@13);LLSPGSVMLVSAR(No iTRAQ8…	10.1.1.12291.1;9.1.1.13611.1;9.1.1.11984.1;7.1.1.11610.1;4.1.1.12831.1;6.1.1.13314.1;11.1.1.7887.1;6.1.1.13318.1;6.1.1.12339.1;4.1.1.11993.1;5.1.1.12755.1;11.1.1.7878.1;11.1.1.12316.1;2.1.1.13077.1;5.1.1.12803.1;14.1.1.4098.1;2.1.1.12309.1;11.1.1.12124.1;7.1.1.12424.1;4.1.1.10249.1;13.1.1.6539.1;8.1.1.12008.1;6.1.1.13187.1;6.1.1.12458.1;20.1.1.6799.1;13.1.1.11263.1;7.1.1.12432.1;2.1.1.13097.1;3.1…	VLSYAPGPLDNDMQQLAR(iTRAQ8plex@N-term; Deamidated(N)@11);DMLYQVLAAEEPSVR(iTRAQ8plex@N-term);LLLINNAATLGDVSK(iTRAQ8plex@N-term; Deamidated(N)@5; iTRAQ8plex(K)@15);VVLAAADLGTEAGVQR(iTRAQ8plex@N-term);VVLAAADLGTEAGVQR(iTRAQ8plex@N-term; Oxidation(D)@7);QLKEELGAQQPDLK(Gln->pyro-Glu@N-term; iTRAQ8plex(K)@3; iTRAQ8plex(K)@14);VLSYAPGPLDNDMQQLAR(iTRAQ8plex@N-term; Oxidation(M)@13);LLSPGSVMLVSAR(No iTRAQ8…	0.00665166	0.119304	0.0614362	0.0477304	0.0329134	0.0210346	0.855067	1.15878	1.08643	0.731139	0.928966	0.77983	0.92045	1.36773	1.1695	0.666807	0.847227
393	29.67	28.91	sp|Q07417|ACADS_MOUSE	Short-chain specific acyl-CoA dehydrogenase, mitochondrial OS=Mus musculus OX=10090 GN=Acads PE=1 SV=2	Q07417	Acads	MOUSE	44.8891	-0.136408	8.68	43.45	20	sp|Q07417|ACADS_MOUSE	MAAALLARARGPLRRALGVRDWRRLHTVYQSVELPETHQMLRQTCRDFAEKELVPIAAQLDREHLFPTAQVKKMGELGLLAMDVPEELSGAGLDYLAYSIALEEISRACASTGVIMSVNNSLYLGPILKFGSAQQKQQWITPFTNGDKIGCFALSEPGNGSDAGAASTTAREEGDSWVLNGTKAWITNSWEASATVVFASTDRSRQNKGISAFLVPMPTPGLTLGKKEDKLGIRASSTANLIFEDCRIPKENLLGEPGMGFKIAMQTLDMGRIGIASQALGIAQASLDCAVKYAENRNAFGAPLTKLQNIQFKLADMALALESARLLTWRAAMLKDNKKPFTKESAMAKLAASEAATAISHQAIQILGGMGYVTEMPAERYYRDARITEIYEGTSEIQR…	23	54	23	IAMQTLDMGR(iTRAQ8plex@N-term; Oxidation(M)@8);TVYQSVELPETHQMLR(iTRAQ8plex@N-term);ENLLGEPGMGFK(iTRAQ8plex@N-term; Oxidation(M)@9; iTRAQ8plex(K)@12);LADMALALESAR(iTRAQ8plex@N-term; Oxidation(M)@4);EHLFPTAQVK(iTRAQ8plex@N-term; iTRAQ8plex(K)@10);LAASEAATAISHQAIQILGGMGYVTEMPAER(iTRAQ8plex@N-term; iTRAQ8plex(S)@11);IAMQTLDMGR(iTRAQ8plex@N-term);ITEIYEGTSEIQR(iTRAQ8plex@N-term; Oxidation(Y)@5);LAASEAA…	2.1.1.9007.1;15.1.1.7006.1;18.1.1.13140.1;8.1.1.13032.1;8.1.1.9799.1;9.1.1.7578.1;7.1.1.12685.1;9.1.1.8718.1;14.1.1.7420.1;7.1.1.12530.1;19.1.1.9189.1;6.1.1.9808.1;3.1.1.12643.1;11.1.1.6856.1;20.1.1.13752.1;8.1.1.5488.1;3.1.1.8843.1;1.1.1.8986.1;20.1.1.13913.1;10.1.1.8285.1;14.1.1.5158.1;8.1.1.12938.1;2.1.1.8389.1;10.1.1.7787.1;3.1.1.4974.1;5.1.1.4562.1;1.1.1.8364.1;4.1.1.13753.1;3.1.1.12628.1;8.…	IAMQTLDMGR(iTRAQ8plex@N-term; Oxidation(M)@8);TVYQSVELPETHQMLR(iTRAQ8plex@N-term);ENLLGEPGMGFK(iTRAQ8plex@N-term; Oxidation(M)@9; iTRAQ8plex(K)@12);LADMALALESAR(iTRAQ8plex@N-term; Oxidation(M)@4);EHLFPTAQVK(iTRAQ8plex@N-term; iTRAQ8plex(K)@10);IAMQTLDMGR(iTRAQ8plex@N-term);LAASEAATAISHQAIQILGGMGYVTEMPAER(iTRAQ8plex@N-term; iTRAQ8plex(S)@11);ITEIYEGTSEIQR(iTRAQ8plex@N-term; Oxidation(Y)@5);LAASEAA…	18	40	18	ENLLGEPGMGFK(iTRAQ8plex@N-term; Oxidation(M)@9; iTRAQ8plex(K)@12);LADMALALESAR(iTRAQ8plex@N-term; Oxidation(M)@4);LAASEAATAISHQAIQILGGMGYVTEMPAER(iTRAQ8plex@N-term; Oxidation(M)@27);ITEIYEGTSEIQR(iTRAQ8plex@N-term; Oxidation(Y)@5);IAMQTLDMGR(iTRAQ8plex@N-term);ENLLGEPGMGFK(iTRAQ8plex@N-term; iTRAQ8plex(K)@12);LAASEAATAISHQAIQILGGMGYVTEMPAER(iTRAQ8plex@N-term; Oxidation(M)@21);IAMQTLDMGR(No iTRAQ8…	18.1.1.7968.1;12.1.1.7158.1;2.1.1.14551.1;4.1.1.12882.1;19.1.1.13595.1;12.1.1.12590.1;11.1.1.13158.1;1.1.1.9429.1;14.1.1.7508.1;11.1.1.13064.1;19.1.1.13547.1;10.1.1.13420.1;4.1.1.12857.1;2.1.1.9973.1;11.1.1.13102.1;1.1.1.13816.1;3.1.1.9156.1;19.1.1.13572.1;20.1.1.9652.1;2.1.1.10139.1;7.1.1.10405.1;19.1.1.9790.1;10.1.1.13318.1;7.1.1.10300.1;10.1.1.13303.1;14.1.1.8255.1;2.1.1.10228.1;2.1.1.9962.1;6…	ENLLGEPGMGFK(iTRAQ8plex@N-term; Oxidation(M)@9; iTRAQ8plex(K)@12);LAASEAATAISHQAIQILGGMGYVTEMPAER(iTRAQ8plex@N-term; Oxidation(M)@27);LADMALALESAR(iTRAQ8plex@N-term; Oxidation(M)@4);IAMQTLDMGR(iTRAQ8plex@N-term);ITEIYEGTSEIQR(iTRAQ8plex@N-term; Oxidation(Y)@5);ENLLGEPGMGFK(iTRAQ8plex@N-term; iTRAQ8plex(K)@12);LAASEAATAISHQAIQILGGMGYVTEMPAER(iTRAQ8plex@N-term; Oxidation(M)@21);IAMQTLDMGR(No iTRAQ8…	20	64	18	TVYQSVELPETHQMLR(iTRAQ8plex@N-term);LAASEAATAISHQAIQILGGMGYVTEMPAER(iTRAQ8plex@N-term; Oxidation(M)@27);QQWITPFTNGDK(iTRAQ8plex@N-term; Deamidated(N)@9; iTRAQ8plex(K)@12);ITEIYEGTSEIQR(iTRAQ8plex@N-term; Oxidation(Y)@5);IAMQTLDMGR(iTRAQ8plex@N-term);ENLLGEPGMGFK(iTRAQ8plex@N-term; iTRAQ8plex(K)@12);ITEIYEGTSEIQR(No iTRAQ8plex@N-term);LAASEAATAISHQAIQILGGMGYVTEMPAER(iTRAQ8plex@N-term; Oxidation(M)…	7.1.1.10238.1;13.1.1.8986.1;2.1.1.10255.1;10.1.1.9147.1;11.1.1.13343.1;19.1.1.10183.1;9.1.1.8767.1;12.1.1.12695.1;7.1.1.4342.1;5.1.1.5056.1;20.1.1.10373.1;9.1.1.13155.1;3.1.1.13573.1;14.1.1.8931.1;15.1.1.9183.1;4.1.1.13820.1;20.1.1.14194.1;20.1.1.10395.1;5.1.1.15046.1;19.1.1.14033.1;10.1.1.13314.1;4.1.1.13785.1;18.1.1.9610.1;2.1.1.14168.1;4.1.1.13708.1;7.1.1.10115.1;6.1.1.10882.1;14.1.1.7464.1;8.…	TVYQSVELPETHQMLR(iTRAQ8plex@N-term);LAASEAATAISHQAIQILGGMGYVTEMPAER(iTRAQ8plex@N-term; Oxidation(M)@27);QQWITPFTNGDK(iTRAQ8plex@N-term; Deamidated(N)@9; iTRAQ8plex(K)@12);ITEIYEGTSEIQR(iTRAQ8plex@N-term; Oxidation(Y)@5);IAMQTLDMGR(iTRAQ8plex@N-term);ENLLGEPGMGFK(iTRAQ8plex@N-term; iTRAQ8plex(K)@12);ITEIYEGTSEIQR(No iTRAQ8plex@N-term);LAASEAATAISHQAIQILGGMGYVTEMPAER(iTRAQ8plex@N-term; Oxidation(M)…	0.00155573	0.60293	0.1045	0.0907874	0.107762	0.0462383	0.737904	1.1272	1.05682	0.642688	0.937562	0.679204	0.937562	1.36773	1.14815	0.679204	0.824138
454	7.95	8.28	sp|P63323|RS12_MOUSE	40S ribosomal protein S12 OS=Mus musculus OX=10090 GN=Rps12 PE=1 SV=2	P63323	Rps12	MOUSE	14.5248	-0.177273	6.82	40.91	5	sp|P63323|RS12_MOUSE;tr|F7AEH4|F7AEH4_MOUSE;tr|Q6ZWZ6|Q6ZWZ6_MOUSE	MAEEGIAAGGVMDVNTALQEVLKTALIHDGLARGIREAAKALDKRQAHLCVLASNCDEPMYVKLVEALLAEHQINLIKVDDNKKLGEWVGLCKIDREGKPRKVVGCSCVVVKDYGKESQAKDVIEEYFKCKK	8	49	8	LGEWVGLCK(iTRAQ8plex@N-term; Methylthio(C)@8; iTRAQ8plex(K)@9);AEEGIAAGGVMDVNTALQEVLK(Protein Terminal Acetyl@N-term; Oxidation(M)@11; iTRAQ8plex(K)@22);QAHLCVLASNCDEPMYVK(iTRAQ8plex@N-term; Methylthio(C)@5; Methylthio(C)@11; iTRAQ8plex(K)@18);TALIHDGLAR(iTRAQ8plex@N-term);AEEGIAAGGVMDVNTALQEVLK(Protein Terminal Acetyl@N-term; Oxidation(M)@11; Deamidated(N)@14; iTRAQ8plex(K)@22);MDVNTALQEVLK(Acet…	20.1.1.14842.1;20.1.1.15029.1;20.1.1.14967.1;20.1.1.14737.1;20.1.1.15048.1;20.1.1.14993.1;20.1.1.14899.1;11.1.1.5026.1;20.1.1.14847.1;20.1.1.14998.1;20.1.1.15163.1;11.1.1.4922.1;1.1.1.13510.1;5.1.1.5430.1;20.1.1.15071.1;20.1.1.14891.1;20.1.1.15087.1;20.1.1.15068.1;20.1.1.15113.1;20.1.1.15093.1;20.1.1.14913.1;20.1.1.15137.1;20.1.1.15188.1;11.1.1.11139.1;20.1.1.14791.1;20.1.1.14949.1;20.1.1.15026.1…	LGEWVGLCK(iTRAQ8plex@N-term; Methylthio(C)@8; iTRAQ8plex(K)@9);AEEGIAAGGVMDVNTALQEVLK(Protein Terminal Acetyl@N-term; Oxidation(M)@11; iTRAQ8plex(K)@22);QAHLCVLASNCDEPMYVK(iTRAQ8plex@N-term; Methylthio(C)@5; Methylthio(C)@11; iTRAQ8plex(K)@18);AEEGIAAGGVMDVNTALQEVLK(Protein Terminal Acetyl@N-term; Oxidation(M)@11; Deamidated(N)@14; iTRAQ8plex(K)@22);TALIHDGLAR(iTRAQ8plex@N-term);MDVNTALQEVLK(Acet…	5	48	5	AEEGIAAGGVMDVNTALQEVLK(Protein Terminal Acetyl@N-term; Deamidated(N)@14; iTRAQ8plex(K)@22);TALQEVLK(iTRAQ8plex@N-term; iTRAQ8plex(K)@8);AEEGIAAGGVMDVNTALQEVLK(Protein Terminal Acetyl@N-term; Oxidation(M)@11; Deamidated(N)@14; iTRAQ8plex(K)@22);LVEALCAEHQINLIK(iTRAQ8plex@N-term; Methylthio(C)@6; iTRAQ8plex(K)@15);AEEGIAAGGVMDVNTALQEVLK(Protein Terminal Acetyl@N-term; iTRAQ8plex(K)@22)	3.1.1.13857.1;3.1.1.14020.1;4.1.1.14437.1;3.1.1.14259.1;4.1.1.14360.1;3.1.1.13841.1;3.1.1.14228.1;3.1.1.14115.1;17.1.1.11747.1;3.1.1.14165.1;3.1.1.13952.1;3.1.1.13735.1;3.1.1.14188.1;3.1.1.13894.1;2.1.1.14585.1;3.1.1.13820.1;3.1.1.14005.1;3.1.1.14372.1;3.1.1.13806.1;4.1.1.14175.1;3.1.1.6787.1;3.1.1.14394.1;3.1.1.14196.1;3.1.1.14064.1;3.1.1.14252.1;3.1.1.14283.1;5.1.1.14255.1;3.1.1.14111.1;15.1.1.…	AEEGIAAGGVMDVNTALQEVLK(Protein Terminal Acetyl@N-term; Deamidated(N)@14; iTRAQ8plex(K)@22);TALQEVLK(iTRAQ8plex@N-term; iTRAQ8plex(K)@8);AEEGIAAGGVMDVNTALQEVLK(Protein Terminal Acetyl@N-term; Oxidation(M)@11; Deamidated(N)@14; iTRAQ8plex(K)@22);AEEGIAAGGVMDVNTALQEVLK(Protein Terminal Acetyl@N-term; iTRAQ8plex(K)@22);LVEALCAEHQINLIK(iTRAQ8plex@N-term; Methylthio(C)@6; iTRAQ8plex(K)@15)	5	26	5	LGEWVGLCK(iTRAQ8plex@N-term; Methylthio(C)@8; iTRAQ8plex(K)@9);AEEGIAAGGVMDVNTALQEVLK(Protein Terminal Acetyl@N-term; Oxidation(M)@11; iTRAQ8plex(K)@22);TALIHDGLAR(iTRAQ8plex@N-term);ESQAKDVIEEYFK(iTRAQ8plex@N-term; iTRAQ8plex(K)@5; iTRAQ8plex(K)@13);AEEGIAAGGVMDVNTALQEVLK(Protein Terminal Acetyl@N-term; iTRAQ8plex(K)@22)	10.1.1.5306.1;3.1.1.14711.1;17.1.1.10908.1;3.1.1.14471.1;3.1.1.14386.1;3.1.1.14772.1;3.1.1.14587.1;6.1.1.5640.1;8.1.1.5517.1;5.1.1.14818.1;10.1.1.5184.1;5.1.1.6066.1;5.1.1.6283.1;3.1.1.14675.1;6.1.1.5740.1;20.1.1.14511.1;3.1.1.14542.1;3.1.1.14638.1;3.1.1.14560.1;16.1.1.12943.1;17.1.1.12790.1;3.1.1.14799.1;5.1.1.6217.1;3.1.1.14320.1;16.1.1.13540.1;3.1.1.14741.1	LGEWVGLCK(iTRAQ8plex@N-term; Methylthio(C)@8; iTRAQ8plex(K)@9);TALIHDGLAR(iTRAQ8plex@N-term);AEEGIAAGGVMDVNTALQEVLK(Protein Terminal Acetyl@N-term; Oxidation(M)@11; iTRAQ8plex(K)@22);ESQAKDVIEEYFK(iTRAQ8plex@N-term; iTRAQ8plex(K)@5; iTRAQ8plex(K)@13);AEEGIAAGGVMDVNTALQEVLK(Protein Terminal Acetyl@N-term; iTRAQ8plex(K)@22)	0.0282207	0.0324676	0.231545	0.0381943	0.116372	0.322569	1.43219	1.90546	1.51356	0.711214	0.765597	0.928966	1.04713	1.59956	1.40605	0.642688	0.870964
506	30.63	30.14	sp|Q91X72|HEMO_MOUSE	Hemopexin OS=Mus musculus OX=10090 GN=Hpx PE=1 SV=2	Q91X72	Hpx	MOUSE	51.3173	-0.442391	7.91	38.91	18	sp|Q91X72|HEMO_MOUSE	MARTAVALNILVLLGLCWSLAVASPLPTANGRVAEVENGTKPDSDVPEHCLDTWSFDAATMDHNGTMLFFKGEFVWRGHSGTRELISARWKNPITSVDAAFRGPDSVFLIKEDKVWVYPPEKKENGYPKLFQEEFPGIPYPPDAAVECHRGECQSEGVLFFQGNRKWFWDFATRTQKERSWSTVGNCTAALRWLERYYCFQGNKFLRFNPVTGEVPPRYPLDARDYFVSCPGRGHGRPRNGTAHGNSTHPMHSRCSPDPGLTALLSDHRGATYAFTGSHYWRLDSSRDGWHSWPIAHHWPQGPSTVDAAFSWDDKVYLIQGTQVYVFLTKGGNNLVSGYPKRLEKELGSPPGISLETIDAAFSCPGSSRLYVSSGRRLWWLDLKSGAQATWTEVSWPHE…	19	35	19	GATYAFTGSHYWR(iTRAQ8plex@N-term; iTRAQ8plex(T)@3);SGAQATWTEVSWPHEK(iTRAQ8plex@N-term; iTRAQ8plex(K)@16);FNPVTGEVPPR(iTRAQ8plex@N-term);KENGYPK(iTRAQ8plex@N-term; iTRAQ8plex(K)@1; Deamidated(N)@3; iTRAQ8plex(K)@7);CSPDPGLTALLSDHR(iTRAQ8plex@N-term; Methylthio(C)@1; iTRAQ8plex(S)@12);PGLTALLSDHR(No iTRAQ8plex@N-term);WFWDFATR(iTRAQ8plex@N-term);GECQSEGVLFFQGNR(iTRAQ8plex@N-term; Methylthio(C)@3);GA…	14.1.1.11679.1;4.1.1.13381.1;20.1.1.2842.1;4.1.1.13382.1;4.1.1.9737.1;8.1.1.4175.1;20.1.1.7616.1;14.1.1.6908.1;12.1.1.7325.1;15.1.1.9823.1;17.1.1.12689.1;20.1.1.13604.1;4.1.1.9966.1;19.1.1.6472.1;18.1.1.4587.1;1.1.1.3235.1;12.1.1.7177.1;4.1.1.9714.1;8.1.1.4170.1;20.1.1.3401.1;12.1.1.7053.1;10.1.1.6282.1;14.1.1.7852.1;8.1.1.12641.1;5.1.1.720.1;14.1.1.2694.1;4.1.1.11121.1;19.1.1.13307.1;9.1.1.4211.…	GATYAFTGSHYWR(iTRAQ8plex@N-term; iTRAQ8plex(T)@3);SGAQATWTEVSWPHEK(iTRAQ8plex@N-term; iTRAQ8plex(K)@16);FNPVTGEVPPR(iTRAQ8plex@N-term);KENGYPK(iTRAQ8plex@N-term; iTRAQ8plex(K)@1; Deamidated(N)@3; iTRAQ8plex(K)@7);CSPDPGLTALLSDHR(iTRAQ8plex@N-term; Methylthio(C)@1; iTRAQ8plex(S)@12);PGLTALLSDHR(No iTRAQ8plex@N-term);WFWDFATR(iTRAQ8plex@N-term);GECQSEGVLFFQGNR(iTRAQ8plex@N-term; Methylthio(C)@3);GA…	15	27	15	GATYAFTGSHYWR(iTRAQ8plex@N-term);RLEKELGSPPGISLETIDAAFSCPGSSR(iTRAQ8plex@N-term; iTRAQ8plex(K)@4; Methylthio(C)@23);ELGSPPGISLETIDAAFSCPGSSR(iTRAQ8plex@N-term; Methylthio(C)@19);SLGPNTCSSN(iTRAQ8plex@N-term; Methylthio(C)@7);SGAQATWTEVSWPHEK(iTRAQ8plex@N-term; iTRAQ8plex(K)@16);FNPVTGEVPPR(iTRAQ8plex@N-term);VNSILGCSQ(iTRAQ8plex@N-term; Deamidated(N)@2; Methylthio(C)@7);GGNNLVSGYPK(iTRAQ8plex@N-t…	2.1.1.13921.1;1.1.1.13215.1;7.1.1.5685.1;11.1.1.12736.1;5.1.1.6386.1;5.1.1.6907.1;3.1.1.7249.1;6.1.1.10239.1;2.1.1.9885.1;16.1.1.11520.1;7.1.1.13930.1;5.1.1.7076.1;14.1.1.7063.1;7.1.1.11434.1;5.1.1.6606.1;7.1.1.5862.1;7.1.1.13976.1;1.1.1.6688.1;15.1.1.12390.1;3.1.1.3342.1;5.1.1.7368.1;19.1.1.3571.1;14.1.1.7190.1;15.1.1.11389.1;15.1.1.7447.1;20.1.1.6903.1;5.1.1.5955.1	GATYAFTGSHYWR(iTRAQ8plex@N-term);ELGSPPGISLETIDAAFSCPGSSR(iTRAQ8plex@N-term; Methylthio(C)@19);RLEKELGSPPGISLETIDAAFSCPGSSR(iTRAQ8plex@N-term; iTRAQ8plex(K)@4; Methylthio(C)@23);SLGPNTCSSN(iTRAQ8plex@N-term; Methylthio(C)@7);SGAQATWTEVSWPHEK(iTRAQ8plex@N-term; iTRAQ8plex(K)@16);FNPVTGEVPPR(iTRAQ8plex@N-term);VNSILGCSQ(iTRAQ8plex@N-term; Deamidated(N)@2; Methylthio(C)@7);LFQEEFPGIPYPPDAAVECHR(iTRA…	18	34	18	GECQSEGVLFFQGNRK(iTRAQ8plex@N-term; Methylthio(C)@3; iTRAQ8plex(K)@16);FNPVTGEVPPR(iTRAQ8plex@N-term);CSPDPGLTALLSDHR(iTRAQ8plex@N-term; Methylthio(C)@1);WFWDFATR(iTRAQ8plex@N-term);DYFVSCPGR(iTRAQ8plex@N-term; Methylthio(C)@6);GECQSEGVLFFQGNR(iTRAQ8plex@N-term; Methylthio(C)@3);GATYAFTGSHYWR(iTRAQ8plex@N-term);WKNPITSVDAAFR(iTRAQ8plex@N-term; iTRAQ8plex(K)@2);SLPQPQKVNSILGCSQ(iTRAQ8plex@N-term; …	14.1.1.7107.1;14.1.1.7000.1;8.1.1.13195.1;19.1.1.6697.1;14.1.1.12100.1;11.1.1.11476.1;3.1.1.13459.1;7.1.1.11280.1;15.1.1.13017.1;12.1.1.13042.1;5.1.1.6808.1;1.1.1.7438.1;19.1.1.13946.1;7.1.1.12120.1;12.1.1.8041.1;20.1.1.3327.1;16.1.1.3155.1;8.1.1.13160.1;17.1.1.10416.1;20.1.1.14083.1;9.1.1.9210.1;11.1.1.12892.1;4.1.1.9806.1;7.1.1.5789.1;15.1.1.10227.1;5.1.1.6418.1;16.1.1.10566.1;15.1.1.13012.1;11…	GECQSEGVLFFQGNRK(iTRAQ8plex@N-term; Methylthio(C)@3; iTRAQ8plex(K)@16);FNPVTGEVPPR(iTRAQ8plex@N-term);CSPDPGLTALLSDHR(iTRAQ8plex@N-term; Methylthio(C)@1);WFWDFATR(iTRAQ8plex@N-term);DYFVSCPGR(iTRAQ8plex@N-term; Methylthio(C)@6);GECQSEGVLFFQGNR(iTRAQ8plex@N-term; Methylthio(C)@3);GATYAFTGSHYWR(iTRAQ8plex@N-term);SLPQPQKVNSILGCSQ(iTRAQ8plex@N-term; iTRAQ8plex(K)@7; Methylthio(C)@14);WKNPITSVDAAFR(i…	0.028891	0.0085763	0.00279963	0.00184636	0.245002	0.00136172	1.49969	1.85353	1.04713	0.794328	0.554626	1.43219	1.47231	2.03236	1	0.711214	0.483059
545	25.04	23.4	sp|P15105|GLNA_MOUSE	Glutamine synthetase OS=Mus musculus OX=10090 GN=Glul PE=1 SV=6	P15105	Glul	MOUSE	42.1194	-0.593566	6.64	37.27	15	sp|P15105|GLNA_MOUSE	MATSASSHLNKGIKQMYMSLPQGEKVQAMYIWVDGTGEGLRCKTRTLDCEPKCVEELPEWNFDGSSTFQSEGSNSDMYLHPVAMFRDPFRKDPNKLVLCEVFKYNRKPAETNLRHICKRIMDMVSNQHPWFGMEQEYTLMGTDGHPFGWPSNGFPGPQGPYYCGVGADKAYGRDIVEAHYRACLYAGVKITGTNAEVMPAQWEFQIGPCEGIRMGDHLWIARFILHRVCEDFGVIATFDPKPIPGNWNGAGCHTNFSTKAMREENGLKCIEEAIDKLSKRHQYHIRAYDPKGGLDNARRLTGFHETSNINDFSAGVANRGASIRIPRTVGQEKKGYFEDRRPSANCDPYAVTEAIVRTCLLNETGDEPFQYKN	15	18	15	RPSANCDPYAVTEAIVR(iTRAQ8plex@N-term; Deamidated(N)@5; Methylthio(C)@6);DIVEAHYR(iTRAQ8plex@N-term);RLTGFHETSNINDFSAGVANR(iTRAQ8plex@N-term);ITGTNAEVMPAQWEFQIGPCEGIR(iTRAQ8plex@N-term; Methylthio(C)@20);SANCDPYAVTEAIVR(iTRAQ8plex@N-term; Methylthio(C)@4);ITGTNAEVMPAQWEFQIGPCEGIR(iTRAQ8plex@N-term; Deamidated(N)@5; Methylthio(C)@20);HQYHIR(iTRAQ8plex@N-term);TCLLNETGDEPFQYKN(iTRAQ8plex@N-term; Meth…	7.1.1.1705.1;4.1.1.11078.1;19.1.1.10900.1;9.1.1.9048.1;10.1.1.13071.1;12.1.1.1428.1;5.1.1.8152.1;19.1.1.10889.1;8.1.1.1735.1;4.1.1.11080.1;14.1.1.11514.1;10.1.1.6695.1;4.1.1.7070.1;16.1.1.92.1;6.1.1.11687.1;12.1.1.4884.1;9.1.1.9154.1;2.1.1.6259.1	DIVEAHYR(iTRAQ8plex@N-term);RPSANCDPYAVTEAIVR(iTRAQ8plex@N-term; Deamidated(N)@5; Methylthio(C)@6);RLTGFHETSNINDFSAGVANR(iTRAQ8plex@N-term);ITGTNAEVMPAQWEFQIGPCEGIR(iTRAQ8plex@N-term; Methylthio(C)@20);SANCDPYAVTEAIVR(iTRAQ8plex@N-term; Methylthio(C)@4);HQYHIR(iTRAQ8plex@N-term);ITGTNAEVMPAQWEFQIGPCEGIR(iTRAQ8plex@N-term; Deamidated(N)@5; Methylthio(C)@20);TCLLNETGDEPFQYKN(iTRAQ8plex@N-term; Meth…	9	16	9	RPSANCDPYAVTEAIVR(iTRAQ8plex@N-term; Deamidated(N)@5; Methylthio(C)@6);VQAMYIWVDGTGEGLR(iTRAQ8plex@N-term);ITGTNAEVMPAQWEFQIGPCEGIR(iTRAQ8plex@N-term; Methylthio(C)@20);SANCDPYAVTEAIVR(iTRAQ8plex@N-term; Methylthio(C)@4);ITGTNAEVMPAQWEFQIGPCEGIR(iTRAQ8plex@N-term; Deamidated(N)@5; Methylthio(C)@20);TCLLNETGDEPFQYKN(iTRAQ8plex@N-term; Methylthio(C)@2; iTRAQ8plex(K)@15);RLTGFHETSNINDFSAGVANR(iTRAQ8…	8.1.1.6801.1;5.1.1.4568.1;1.1.1.11000.1;9.1.1.11271.1;5.1.1.7215.1;5.1.1.11650.1;15.1.1.12236.1;5.1.1.7104.1;9.1.1.11228.1;7.1.1.11379.1;7.1.1.6026.1;15.1.1.11797.1;5.1.1.11770.1;12.1.1.13005.1;5.1.1.7101.1;7.1.1.6048.1	RPSANCDPYAVTEAIVR(iTRAQ8plex@N-term; Deamidated(N)@5; Methylthio(C)@6);VQAMYIWVDGTGEGLR(iTRAQ8plex@N-term);ITGTNAEVMPAQWEFQIGPCEGIR(iTRAQ8plex@N-term; Methylthio(C)@20);SANCDPYAVTEAIVR(iTRAQ8plex@N-term; Methylthio(C)@4);ITGTNAEVMPAQWEFQIGPCEGIR(iTRAQ8plex@N-term; Deamidated(N)@5; Methylthio(C)@20);TCLLNETGDEPFQYKN(iTRAQ8plex@N-term; Methylthio(C)@2; iTRAQ8plex(K)@15);RLTGFHETSNINDFSAGVANR(iTRAQ8…	18	25	18	RPSANCDPYAVTEAIVR(iTRAQ8plex@N-term; Deamidated(N)@5; Methylthio(C)@6);VQAMYIWVDGTGEGLR(iTRAQ8plex@N-term);LTGFHETSNINDFSAGVANR(iTRAQ8plex@N-term);RLTGFHETSNINDFSAGVANR(iTRAQ8plex@N-term);TLDCEPK(iTRAQ8plex@N-term; Methylthio(C)@4; iTRAQ8plex(K)@7);MGDHLWIAR(iTRAQ8plex@N-term);SANCDPYAVTEAIVR(iTRAQ8plex@N-term; Methylthio(C)@4);AMREENGLK(iTRAQ8plex@N-term; Deamidated(N)@6; iTRAQ8plex(K)@9);ATSASS…	15.1.1.4561.1;7.1.1.8856.1;12.1.1.5879.1;7.1.1.7343.1;4.1.1.11177.1;14.1.1.4568.1;5.1.1.7586.1;6.1.1.12332.1;10.1.1.785.1;18.1.1.11441.1;7.1.1.12834.1;7.1.1.11226.1;14.1.1.4717.1;2.1.1.11455.1;9.1.1.4314.1;5.1.1.7582.1;11.1.1.7702.1;15.1.1.6608.1;13.1.1.12013.1;11.1.1.7646.1;1.1.1.12329.1;4.1.1.1212.1;15.1.1.12399.1;19.1.1.11333.1;12.1.1.5840.1	RPSANCDPYAVTEAIVR(iTRAQ8plex@N-term; Deamidated(N)@5; Methylthio(C)@6);VQAMYIWVDGTGEGLR(iTRAQ8plex@N-term);LTGFHETSNINDFSAGVANR(iTRAQ8plex@N-term);RLTGFHETSNINDFSAGVANR(iTRAQ8plex@N-term);TLDCEPK(iTRAQ8plex@N-term; Methylthio(C)@4; iTRAQ8plex(K)@7);MGDHLWIAR(iTRAQ8plex@N-term);SANCDPYAVTEAIVR(iTRAQ8plex@N-term; Methylthio(C)@4);AMREENGLK(iTRAQ8plex@N-term; Deamidated(N)@6; iTRAQ8plex(K)@9);ATSASS…	0.0043465	0.0187766	9.74473e-05	0.164656	0.00389278	0.0701627	0.444631	0.794328	0.505825	0.524808	0.608135	0.855067	0.432514	0.887156	0.559758	0.469894	0.636796
581	39.25	37.15	sp|P09405|NUCL_MOUSE	Nucleolin OS=Mus musculus OX=10090 GN=Ncl PE=1 SV=2	P09405	Ncl	MOUSE	76.7226	-1.09293	4.68	36.07	21	sp|P09405|NUCL_MOUSE;tr|Q3TGR3|Q3TGR3_MOUSE;tr|Q3TL52|Q3TL52_MOUSE;tr|Q3TT41|Q3TT41_MOUSE;tr|Q8CD23|Q8CD23_MOUSE;tr|Q8CE30|Q8CE30_MOUSE	MVKLAKAGKTHGEAKKMAPPPKEVEEDSEDEEMSEDEDDSSGEEEVVIPQKKGKKATTTPAKKVVVSQTKKAAVPTPAKKAAVTPGKKAVATPAKKNITPAKVIPTPGKKGAAQAKALVPTPGKKGAATPAKGAKNGKNAKKEDSDEDEDEEDEDDSDEDEDDEEEDEFEPPIVKGVKPAKAAPAAPASEDEEDDEDEDDEEDDDEEEEDDSEEEVMEITTAKGKKTPAKVVPMKAKSVAEEEDDEEEDEDDEDEDDEEEDDEDDDEEEEEEEPVKAAPGKRKKEMTKQKEAPEAKKQKVEGSEPTTPFNLFIGNLNPNKSVNELKFAISELFAKNDLAVVDVRTGTNRKFGYVDFESAEDLEKALELTGLKVFGNEIKLEKPKGRDSKKVRAARTLLA…	21	28	21	KVVVSQTK(iTRAQ8plex@N-term; iTRAQ8plex(K)@1; iTRAQ8plex(K)@8);GAAQAK(iTRAQ8plex@N-term; iTRAQ8plex(K)@6);SKGIAYIEFK(Carbamyl@N-term; iTRAQ8plex(K)@2; iTRAQ8plex(K)@10);ETLEEVFEK(iTRAQ8plex@N-term; iTRAQ8plex(K)@9);GFGFVDFNSEEDAK(iTRAQ8plex@N-term; Deamidated(N)@8; iTRAQ8plex(K)@14);EALNSCNKMEIEGR(iTRAQ8plex@N-term; Methylthio(C)@6; iTRAQ8plex(K)@8);TSTWSGESK(iTRAQ8plex@N-term; iTRAQ8plex(K)@9);QK…	4.1.1.8995.1;4.1.1.9886.1;7.1.1.10238.1;8.1.1.10751.1;3.1.1.9553.1;3.1.1.4880.1;16.1.1.9487.1;17.1.1.6186.1;4.1.1.10201.1;3.1.1.3988.1;14.1.1.9476.1;8.1.1.2701.1;15.1.1.9814.1;2.1.1.290.1;5.1.1.6178.1;10.1.1.1346.1;8.1.1.1459.1;4.1.1.8563.1;3.1.1.9500.1;6.1.1.8996.1;6.1.1.116.1;3.1.1.9452.1;2.1.1.989.1;9.1.1.352.1;15.1.1.9068.1;7.1.1.9946.1;10.1.1.4506.1;17.1.1.3594.1	KVVVSQTK(iTRAQ8plex@N-term; iTRAQ8plex(K)@1; iTRAQ8plex(K)@8);GAAQAK(iTRAQ8plex@N-term; iTRAQ8plex(K)@6);SKGIAYIEFK(Carbamyl@N-term; iTRAQ8plex(K)@2; iTRAQ8plex(K)@10);ETLEEVFEK(iTRAQ8plex@N-term; iTRAQ8plex(K)@9);EALNSCNKMEIEGR(iTRAQ8plex@N-term; Methylthio(C)@6; iTRAQ8plex(K)@8);GFGFVDFNSEEDAK(iTRAQ8plex@N-term; Deamidated(N)@8; iTRAQ8plex(K)@14);TSTWSGESK(iTRAQ8plex@N-term; iTRAQ8plex(K)@9);SV…	17	21	17	SVSLYYTGEKGQR(iTRAQ8plex@N-term; iTRAQ8plex(K)@10);TSTWSGESK(iTRAQ8plex@N-term; iTRAQ8plex(K)@9);GYAFIEFASFEDAK(iTRAQ8plex@N-term; iTRAQ8plex(K)@14);SVSLYYTGEK(iTRAQ8plex@N-term; iTRAQ8plex(K)@10);TLVLSNLSYSATK(iTRAQ8plex@N-term; iTRAQ8plex(K)@13);VVVSQTKK(iTRAQ8plex@N-term; iTRAQ8plex(K)@7; iTRAQ8plex(K)@8);ALELTGLK(iTRAQ8plex@N-term; iTRAQ8plex(K)@8);GLSEDTTEETLKESFEGSVR(iTRAQ8plex@N-term; iTRA…	11.1.1.13510.1;19.1.1.300.1;10.1.1.10603.1;6.1.1.1341.1;20.1.1.4158.1;18.1.1.10099.1;12.1.1.2327.1;18.1.1.10197.1;8.1.1.13315.1;7.1.1.13519.1;3.1.1.5125.1;9.1.1.8435.1;9.1.1.10050.1;18.1.1.2065.1;8.1.1.9207.1;12.1.1.1364.1;5.1.1.12199.1;11.1.1.736.1;5.1.1.12035.1;8.1.1.3711.1;15.1.1.12580.1	SVSLYYTGEKGQR(iTRAQ8plex@N-term; iTRAQ8plex(K)@10);TSTWSGESK(iTRAQ8plex@N-term; iTRAQ8plex(K)@9);GYAFIEFASFEDAK(iTRAQ8plex@N-term; iTRAQ8plex(K)@14);SVSLYYTGEK(iTRAQ8plex@N-term; iTRAQ8plex(K)@10);TLVLSNLSYSATK(iTRAQ8plex@N-term; iTRAQ8plex(K)@13);ALELTGLK(iTRAQ8plex@N-term; iTRAQ8plex(K)@8);VVVSQTKK(iTRAQ8plex@N-term; iTRAQ8plex(K)@7; iTRAQ8plex(K)@8);GLSEDTTEETLKESFEGSVR(iTRAQ8plex@N-term; iTRA…	20	40	19	KVVVSQTK(iTRAQ8plex@N-term; iTRAQ8plex(K)@1; iTRAQ8plex(K)@8);SVSLYYTGEKGQR(iTRAQ8plex@N-term; iTRAQ8plex(K)@10);TSTWSGESK(iTRAQ8plex@N-term; iTRAQ8plex(K)@9);ELTGLK(iTRAQ8plex@N-term; iTRAQ8plex(K)@6);NDLAVVDVR(iTRAQ8plex@N-term);GYAFIEFASFEDAK(iTRAQ8plex@N-term; iTRAQ8plex(K)@14);SVSLYYTGEK(iTRAQ8plex@N-term; iTRAQ8plex(K)@10);TLVLSNLSYSATK(iTRAQ8plex@N-term; iTRAQ8plex(K)@13);ALELTGLK(iTRAQ8pl…	8.1.1.4081.1;11.1.1.1488.1;3.1.1.5717.1;3.1.1.950.1;12.1.1.622.1;5.1.1.10623.1;13.1.1.3286.1;6.1.1.9876.1;13.1.1.553.1;9.1.1.9068.1;8.1.1.9496.1;12.1.1.1278.1;12.1.1.12916.1;7.1.1.11044.1;4.1.1.11022.1;10.1.1.10685.1;5.1.1.6624.1;10.1.1.10914.1;7.1.1.13177.1;5.1.1.4580.1;5.1.1.11296.1;18.1.1.10432.1;20.1.1.5746.1;5.1.1.10298.1;12.1.1.1447.1;9.1.1.724.1;2.1.1.439.1;5.1.1.4803.1;5.1.1.11420.1;9.1.1…	KVVVSQTK(iTRAQ8plex@N-term; iTRAQ8plex(K)@1; iTRAQ8plex(K)@8);SVSLYYTGEKGQR(iTRAQ8plex@N-term; iTRAQ8plex(K)@10);TSTWSGESK(iTRAQ8plex@N-term; iTRAQ8plex(K)@9);NDLAVVDVR(iTRAQ8plex@N-term);GYAFIEFASFEDAK(iTRAQ8plex@N-term; iTRAQ8plex(K)@14);SVSLYYTGEK(iTRAQ8plex@N-term; iTRAQ8plex(K)@10);TLVLSNLSYSATK(iTRAQ8plex@N-term; iTRAQ8plex(K)@13);ALELTGLK(iTRAQ8plex@N-term; iTRAQ8plex(K)@8);GIAYIEFK(iTRAQ8…	0.0415829	0.167506	0.0597465	0.044999	0.81424	0.214325	1.20226	0.731139	0.855067	1.59956	1.14815	1.38038	1.34276	0.758578	1.27057	1.72187	1.65959
683	21.55	20.83	sp|Q62433|NDRG1_MOUSE	Protein NDRG1 OS=Mus musculus OX=10090 GN=Ndrg1 PE=1 SV=1	Q62433	Ndrg1	MOUSE	43.0084	-0.31599	5.69	32.99	20	sp|Q62433|NDRG1_MOUSE;tr|B7ZWC0|B7ZWC0_MOUSE;tr|Q3TD08|Q3TD08_MOUSE;tr|Q3TSR4|Q3TSR4_MOUSE;tr|Q545R3|Q545R3_MOUSE	MSRELHDVDLAEVKPLVEKGESITGLLQEFDVQEQDIETLHGSLHVTLCGTPKGNRPVILTYHDIGMNHKTCYNPLFNSEDMQEITQHFAVCHVDAPGQQDGAPSFPVGYMYPSMDQLAEMLPGVLHQFGLKSVIGMGTGAGAYILTRFALNNPEMVEGLVLMNVNPCAEGWMDWAASKISGWTQALPDMVVSHLFGKEEIHNNVEVVHTYRQHILNDMNPSNLHLFISAYNSRRDLEIERPMPGTHTVTLQCPALLVVGDNSPAVDAVVECNSKLDPTKTTLLKMADCGGLPQISQPAKLAEAFKYFVQGMGYMPSASMTRLMRSRTASGSSVTSLEGTRSRSHTSEGPRSRSHTSEGSRSRSHTSEDARLNITPNSGATGNNAGPKSMEVSC	20	37	20	SPAVDAVVECNSK(iTRAQ8plex@N-term; Methylthio(C)@10; Deamidated(N)@11; iTRAQ8plex(K)@13);LNITPNSGATGN(iTRAQ8plex@N-term; Deamidated(N)@6);SVIGMGTGAGAYILTR(iTRAQ8plex@N-term; Dehydrated(T)@7);GNRPVILTYHDIGMNHK(iTRAQ8plex@N-term; iTRAQ8plex(K)@17);MADCGGLPQISQPAK(iTRAQ8plex@N-term; Methylthio(C)@4; iTRAQ8plex(K)@15);TASGSSVTSLEGTR(iTRAQ8plex@N-term);YFVQGMGYMPSASMTR(iTRAQ8plex@N-term; Oxidation(M)@9)…	19.1.1.14499.1;20.1.1.11966.1;12.1.1.1616.1;20.1.1.11506.1;20.1.1.11210.1;14.1.1.3670.1;19.1.1.9943.1;8.1.1.7739.1;20.1.1.9000.1;9.1.1.9978.1;20.1.1.11481.1;19.1.1.11152.1;19.1.1.10066.1;17.1.1.8514.1;20.1.1.8938.1;10.1.1.2366.1;7.1.1.4783.1;4.1.1.8015.1;9.1.1.10199.1;20.1.1.8981.1;20.1.1.9104.1;11.1.1.4794.1;11.1.1.2083.1;11.1.1.4677.1;10.1.1.1374.1;11.1.1.4479.1;18.1.1.2372.1;12.1.1.4412.1;19.1…	SPAVDAVVECNSK(iTRAQ8plex@N-term; Methylthio(C)@10; Deamidated(N)@11; iTRAQ8plex(K)@13);LNITPNSGATGN(iTRAQ8plex@N-term; Deamidated(N)@6);SVIGMGTGAGAYILTR(iTRAQ8plex@N-term; Dehydrated(T)@7);GNRPVILTYHDIGMNHK(iTRAQ8plex@N-term; iTRAQ8plex(K)@17);TASGSSVTSLEGTR(iTRAQ8plex@N-term);MADCGGLPQISQPAK(iTRAQ8plex@N-term; Methylthio(C)@4; iTRAQ8plex(K)@15);YFVQGMGYMPSASMTR(iTRAQ8plex@N-term; Oxidation(M)@9)…	12	22	12	MADCGGLPQISQPAK(iTRAQ8plex@N-term; Oxidation(M)@1; Methylthio(C)@4; iTRAQ8plex(K)@15);SVIGMGTGAGAYILTR(iTRAQ8plex@N-term);TASGSSVTSLEGTR(iTRAQ8plex@N-term; Phospho(S)@6);SVIGMGTGAGAYILTR(iTRAQ8plex@N-term; Dehydrated(T)@7);LNITPNSGATGNN(iTRAQ8plex@N-term; Deamidated(N)@6; Deamidated(N)@12);YFVQGMGYMPSASMTR(iTRAQ8plex@N-term; Oxidation(M)@6);YFVQGMGYMPSASMTR(iTRAQ8plex@N-term);TASGSSVTSLEGTR(iTRAQ…	2.1.1.11487.1;1.1.1.14416.1;1.1.1.14637.1;19.1.1.9494.1;13.1.1.1168.1;20.1.1.4395.1;1.1.1.10066.1;14.1.1.2218.1;8.1.1.5624.1;2.1.1.10370.1;6.1.1.8184.1;1.1.1.14494.1;10.1.1.5449.1;2.1.1.10391.1;2.1.1.9297.1;2.1.1.9443.1;7.1.1.5315.1;1.1.1.11225.1;1.1.1.14679.1;12.1.1.7301.1;3.1.1.10522.1;1.1.1.10075.1	MADCGGLPQISQPAK(iTRAQ8plex@N-term; Oxidation(M)@1; Methylthio(C)@4; iTRAQ8plex(K)@15);SVIGMGTGAGAYILTR(iTRAQ8plex@N-term);TASGSSVTSLEGTR(iTRAQ8plex@N-term; Phospho(S)@6);SVIGMGTGAGAYILTR(iTRAQ8plex@N-term; Dehydrated(T)@7);LNITPNSGATGNN(iTRAQ8plex@N-term; Deamidated(N)@6; Deamidated(N)@12);YFVQGMGYMPSASMTR(iTRAQ8plex@N-term; Oxidation(M)@14);TASGSSVTSLEGTR(iTRAQ8plex@N-term);LNITPNSGATGNNAGPK(iTR…	19	53	19	SVIGMGTGAGAYILTR(iTRAQ8plex@N-term; Oxidation(M)@5);LDPTKTTLLK(iTRAQ8plex@N-term; iTRAQ8plex(K)@5; iTRAQ8plex(K)@10);MADCGGLPQISQPAK(iTRAQ8plex@N-term; Methylthio(C)@4; iTRAQ8plex(K)@15);TASGSSVTSLEGTR(iTRAQ8plex@N-term);SRTASGSSVTSLEGTR(iTRAQ8plex@N-term);TASGSSVTSLEGTR(No iTRAQ8plex@N-term);YFVQGMGYMPSASMTR(iTRAQ8plex@N-term; Oxidation(M)@9);LNITPNSGATGNN(iTRAQ8plex@N-term);MADCGGLPQISQPAK(iTRA…	18.1.1.9626.1;11.1.1.2488.1;12.1.1.9868.1;17.1.1.3848.1;20.1.1.9720.1;3.1.1.7673.1;11.1.1.1569.1;11.1.1.2360.1;20.1.1.4269.1;19.1.1.9046.1;20.1.1.9542.1;1.1.1.16035.1;20.1.1.11613.1;16.1.1.1719.1;20.1.1.9607.1;16.1.1.8393.1;20.1.1.4469.1;10.1.1.6335.1;20.1.1.11571.1;19.1.1.9403.1;10.1.1.1636.1;8.1.1.10762.1;10.1.1.1996.1;19.1.1.14744.1;2.1.1.9589.1;15.1.1.699.1;20.1.1.11593.1;5.1.1.1555.1;19.1.1.…	SVIGMGTGAGAYILTR(iTRAQ8plex@N-term; Oxidation(M)@5);LDPTKTTLLK(iTRAQ8plex@N-term; iTRAQ8plex(K)@5; iTRAQ8plex(K)@10);TASGSSVTSLEGTR(iTRAQ8plex@N-term);MADCGGLPQISQPAK(iTRAQ8plex@N-term; Methylthio(C)@4; iTRAQ8plex(K)@15);SRTASGSSVTSLEGTR(iTRAQ8plex@N-term);TASGSSVTSLEGTR(No iTRAQ8plex@N-term);YFVQGMGYMPSASMTR(iTRAQ8plex@N-term; Oxidation(M)@9);LNITPNSGATGNN(iTRAQ8plex@N-term);MADCGGLPQISQPAK(iTRA…	0.0110456	0.03039	0.043954	0.00143444	0.0362768	0.00816331	1.27057	1.8197	1.35519	0.691831	0.744732	0.928966	1.40605	1.95885	1.52757	0.672977	0.751623
782	40.25	38.79	sp|P41216|ACSL1_MOUSE	Long-chain-fatty-acid--CoA ligase 1 OS=Mus musculus OX=10090 GN=Acsl1 PE=1 SV=2	P41216	Acsl1	MOUSE	77.9507	-0.0453505	6.81	30.33	23	sp|P41216|ACSL1_MOUSE;tr|D3Z041|D3Z041_MOUSE	MEVHELFRYFRMPELIDIRQYVRTLPTNTLMGFGAFAALTTFWYATRPKALKPPCDLSMQSVEIAGTTDGIRRSAVLEDDKLLVYYYDDVRTMYDGFQRGIQVSNNGPCLGSRKPNQPYEWISYKEVAELAECIGSGLIQKGFKPCSEQFIGLFSQNRPEWVIVEQGCFSYSMVVVPLYDTLGADAITYIVNKAELSVIFADKPEKAKLLLEGVENKLTPCLKIIVIMDSYGSDLVERGKKCGVEIISLKALEDLGRVNRVKPKPPEPEDLAIICFTSGTTGNPKGAMITHQNIINDCSGFIKATESAFIASTDDVLISFLPLAHMFETVVECVMLCHGAKIGFFQGDIRLLMDDLKVLQPTIFPVVPRLLNRMFDRIFGQANTSLKRWLLDFASKRKE…	19	33	17	LVDVEEMNYLASK(iTRAQ8plex@N-term; iTRAQ8plex(K)@13);TAEALDKDGWLHTGDIGK(iTRAQ8plex@N-term; iTRAQ8plex(K)@7; iTRAQ8plex(K)@18);LMITGAAPVSATVLTFLR(iTRAQ8plex@N-term; Oxidation(M)@2);SAVLEDDKLLVYYYDDVR(iTRAQ8plex@N-term; iTRAQ8plex(K)@8);GIAVHPELFSIDNGLLTPTLK(iTRAQ8plex@N-term; Deamidated(N)@13; iTRAQ8plex(K)@21);VLTFLR(iTRAQ8plex@N-term);GLQGSFEELCR(iTRAQ8plex@N-term; Methylthio(C)@10);SQIDELYATIKI(i…	4.1.1.9288.1;18.1.1.9292.1;10.1.1.13285.1;11.1.1.13597.1;17.1.1.6487.1;19.1.1.9369.1;3.1.1.11213.1;4.1.1.12473.1;3.1.1.11204.1;8.1.1.13196.1;4.1.1.12070.1;19.1.1.11837.1;5.1.1.6958.1;14.1.1.10834.1;20.1.1.9449.1;9.1.1.13460.1;5.1.1.12512.1;17.1.1.11831.1;11.1.1.13327.1;4.1.1.12107.1;4.1.1.12633.1;9.1.1.13519.1;17.1.1.7349.1;19.1.1.9352.1;16.1.1.5305.1;6.1.1.12293.1;4.1.1.9279.1;5.1.1.12606.1;8.1.…	LVDVEEMNYLASK(iTRAQ8plex@N-term; iTRAQ8plex(K)@13);TAEALDKDGWLHTGDIGK(iTRAQ8plex@N-term; iTRAQ8plex(K)@7; iTRAQ8plex(K)@18);LMITGAAPVSATVLTFLR(iTRAQ8plex@N-term; Oxidation(M)@2);SAVLEDDKLLVYYYDDVR(iTRAQ8plex@N-term; iTRAQ8plex(K)@8);GIAVHPELFSIDNGLLTPTLK(iTRAQ8plex@N-term; Deamidated(N)@13; iTRAQ8plex(K)@21);GLQGSFEELCR(iTRAQ8plex@N-term; Methylthio(C)@10);EVAELAECIGSGLIQK(iTRAQ8plex@N-term; Meth…	17	21	15	LVDVEEMNYLASK(iTRAQ8plex@N-term; iTRAQ8plex(K)@13);SQIDELYATIK(iTRAQ8plex@N-term; iTRAQ8plex(K)@11);LVDVEEMNYLASKGEGEVCVK(iTRAQ8plex@N-term; iTRAQ8plex(K)@13; Methylthio(C)@19; iTRAQ8plex(K)@21);SAVLEDDKLLVYYYDDVR(iTRAQ8plex@N-term; iTRAQ8plex(K)@8);GLQGSFEELCR(iTRAQ8plex@N-term; Methylthio(C)@10);SQIDELYATIKI(iTRAQ8plex@N-term; iTRAQ8plex(K)@11);IIVIMDSYGSDLVER(Carbamyl@N-term);WLPNGTLK(iTRAQ8pl…	11.1.1.13332.1;7.1.1.12264.1;12.1.1.11542.1;8.1.1.10405.1;19.1.1.7174.1;2.1.1.9805.1;3.1.1.8853.1;2.1.1.12793.1;12.1.1.13290.1;8.1.1.12353.1;8.1.1.9355.1;13.1.1.13005.1;8.1.1.12531.1;3.1.1.11300.1;13.1.1.13309.1;2.1.1.9825.1;16.1.1.9339.1;3.1.1.9874.1;8.1.1.6566.1;3.1.1.11737.1;19.1.1.5828.1	LLMDDLK(iTRAQ8plex@N-term; iTRAQ8plex(K)@7);EAGLKPFEQVK(iTRAQ8plex@N-term; iTRAQ8plex(K)@5; iTRAQ8plex(K)@11);LVDVEEMNYLASK(iTRAQ8plex@N-term; iTRAQ8plex(K)@13);AILDDLLK(iTRAQ8plex@N-term; iTRAQ8plex(K)@8);SQIDELYATIK(iTRAQ8plex@N-term; iTRAQ8plex(K)@11);LVDVEEMNYLASKGEGEVCVK(iTRAQ8plex@N-term; iTRAQ8plex(K)@13; Methylthio(C)@19; iTRAQ8plex(K)@21);GIQVSNNGPCLGSR(iTRAQ8plex@N-term; Deamidated(N)@6…	23	40	21	WLLDFASK(iTRAQ8plex@N-term; iTRAQ8plex(K)@8);MPELIDIR(iTRAQ8plex@N-term);LVDVEEMNYLASK(iTRAQ8plex@N-term; iTRAQ8plex(K)@13);LAQGEYIAPEKIENIYLR(iTRAQ8plex@N-term; iTRAQ8plex(K)@11);GEGEVCVK(iTRAQ8plex@N-term; Methylthio(C)@6; iTRAQ8plex(K)@8);SAVLEDDKLLVYYYDDVR(iTRAQ8plex@N-term; iTRAQ8plex(K)@8);GIAVHPELFSIDNGLLTPTLK(iTRAQ8plex@N-term; Deamidated(N)@13; iTRAQ8plex(K)@21);VLTFLR(iTRAQ8plex@N-term)…	19.1.1.12371.1;12.1.1.13269.1;15.1.1.12039.1;4.1.1.12307.1;20.1.1.9663.1;9.1.1.8214.1;5.1.1.12216.1;5.1.1.14185.1;3.1.1.9662.1;3.1.1.10867.1;11.1.1.13901.1;8.1.1.12611.1;14.1.1.8918.1;15.1.1.12016.1;7.1.1.9481.1;13.1.1.13077.1;2.1.1.10062.1;18.1.1.12953.1;8.1.1.12610.1;5.1.1.14321.1;10.1.1.13830.1;4.1.1.9431.1;5.1.1.7577.1;8.1.1.12498.1;7.1.1.6594.1;7.1.1.11842.1;8.1.1.7090.1;11.1.1.13581.1;5.1.1…	WLLDFASK(iTRAQ8plex@N-term; iTRAQ8plex(K)@8);MPELIDIR(iTRAQ8plex@N-term);LVDVEEMNYLASK(iTRAQ8plex@N-term; iTRAQ8plex(K)@13);LAQGEYIAPEKIENIYLR(iTRAQ8plex@N-term; iTRAQ8plex(K)@11);GEGEVCVK(iTRAQ8plex@N-term; Methylthio(C)@6; iTRAQ8plex(K)@8);SAVLEDDKLLVYYYDDVR(iTRAQ8plex@N-term; iTRAQ8plex(K)@8);GIAVHPELFSIDNGLLTPTLK(iTRAQ8plex@N-term; Deamidated(N)@13; iTRAQ8plex(K)@21);GLQGSFEELCR(iTRAQ8plex@N-…	0.0130724	0.279919	0.0319633	0.240327	0.306112	0.00214338	0.724436	1.00925	0.981748	0.704693	0.954993	0.731139	0.831764	1.05682	1.07647	0.77983	1.00925
880	23.1	22.47	sp|Q9DCD0|6PGD_MOUSE	6-phosphogluconate dehydrogenase, decarboxylating OS=Mus musculus OX=10090 GN=Pgd PE=1 SV=3	Q9DCD0	Pgd	MOUSE	53.2468	-0.14824	6.81	27.95	13	sp|Q9DCD0|6PGD_MOUSE;tr|Q3UAG2|Q3UAG2_MOUSE;tr|Q91V28|Q91V28_MOUSE;tr|Q91YT9|Q91YT9_MOUSE	MAQADIALIGLAVMGQNLILNMNDHGFVVCAFNRTVSKVDDFLANEAKGTKVVGAQSLKDMVSKLKKPRRVILLVKAGQAVDDFIEKLVPLLDTGDIIIDGGNSEYRDTTRRCRDLKAKGILFVGSGVSGGEEGARYGPSLMPGGNKEAWPHIKAIFQAIAAKVGTGEPCCDWVGDEGAGHFVKMVHNGIEYGDMQLICEAYHLMKDVLGMRHEEMAQAFEEWNKTELDSFLIEITANILKYRDTDGKELLPKIRDSAGQKGTGKWTAISALEYGMPVTLIGEAVFARCLSSLKEERVQASQKLKGPKVVQLEGSKKSFLEDIRKALYASKIISYAQGFMLLRQAATEFGWTLNYGGIALMWRGGCIIRSVFLGKIKDAFERNPELQNLLLDDFFKSAV…	13	23	13	VVQLEGSKK(iTRAQ8plex@N-term; iTRAQ8plex(K)@8; iTRAQ8plex(K)@9);LVPLLDTGDIIIDGGN(iTRAQ8plex@N-term);VVGAQSLKDMVSK(iTRAQ8plex@N-term; iTRAQ8plex(K)@8; iTRAQ8plex(K)@13);YGPSLMPGGNKEAWPHIK(iTRAQ8plex@N-term; iTRAQ8plex(K)@11; iTRAQ8plex(K)@18);AKGILFVGSGVSGGEEGAR(Carbamyl@N-term; iTRAQ8plex(K)@2);NPELQNLLLDDFFK(iTRAQ8plex@N-term; iTRAQ8plex(K)@14);LVPLLDTGDIIIDGGNSEYR(iTRAQ8plex@N-term; Deamidated(N…	5.1.1.9616.1;5.1.1.9475.1;2.1.1.13555.1;7.1.1.7955.1;5.1.1.9822.1;17.1.1.10246.1;12.1.1.11952.1;5.1.1.14167.1;2.1.1.13553.1;6.1.1.9160.1;5.1.1.9613.1;16.1.1.10202.1;10.1.1.7220.1;18.1.1.2740.1;5.1.1.14325.1;5.1.1.9820.1;9.1.1.13372.1;12.1.1.7392.1;6.1.1.13833.1;7.1.1.9799.1;6.1.1.13830.1;12.1.1.7113.1;5.1.1.14168.1	VVQLEGSKK(iTRAQ8plex@N-term; iTRAQ8plex(K)@8; iTRAQ8plex(K)@9);LVPLLDTGDIIIDGGN(iTRAQ8plex@N-term);VVGAQSLKDMVSK(iTRAQ8plex@N-term; iTRAQ8plex(K)@8; iTRAQ8plex(K)@13);YGPSLMPGGNKEAWPHIK(iTRAQ8plex@N-term; iTRAQ8plex(K)@11; iTRAQ8plex(K)@18);AKGILFVGSGVSGGEEGAR(Carbamyl@N-term; iTRAQ8plex(K)@2);NPELQNLLLDDFFK(iTRAQ8plex@N-term; iTRAQ8plex(K)@14);LVPLLDTGDIIIDGGNSEYR(iTRAQ8plex@N-term; Deamidated(N…	5	9	5	WTAISALEYGMPVTLIGEAVFAR(iTRAQ8plex@N-term);AGQAVDDFIEK(iTRAQ8plex@N-term; iTRAQ8plex(K)@11);LVPLLDTGDIIIDGGNSEYR(iTRAQ8plex@N-term);LVPLLDTGDIIIDGGN(iTRAQ8plex@N-term);GILFVGSGVSGGEEGAR(iTRAQ8plex@N-term)	9.1.1.13369.1;9.1.1.8535.1;8.1.1.9336.1;8.1.1.9221.1;8.1.1.14197.1;9.1.1.13377.1;8.1.1.9210.1;10.1.1.8609.1;3.1.1.13502.1	WTAISALEYGMPVTLIGEAVFAR(iTRAQ8plex@N-term);AGQAVDDFIEK(iTRAQ8plex@N-term; iTRAQ8plex(K)@11);LVPLLDTGDIIIDGGNSEYR(iTRAQ8plex@N-term);LVPLLDTGDIIIDGGN(iTRAQ8plex@N-term);GILFVGSGVSGGEEGAR(iTRAQ8plex@N-term)	13	29	13	VDDFLANEAK(iTRAQ8plex@N-term; iTRAQ8plex(K)@10);HEMLPANLIQAQR(iTRAQ8plex@N-term);YGPSLMPGGNK(iTRAQ8plex@N-term; iTRAQ8plex(K)@11);VVQLEGSKK(iTRAQ8plex@N-term; iTRAQ8plex(K)@8; iTRAQ8plex(K)@9);LVPLLDTGDIIIDGGN(iTRAQ8plex@N-term);VVGAQSLKDMVSK(iTRAQ8plex@N-term; iTRAQ8plex(K)@8; iTRAQ8plex(K)@13);LVPLLDTGDIIIDGGNSEYRDTTR(iTRAQ8plex@N-term);AGQAVDDFIEK(iTRAQ8plex@N-term; iTRAQ8plex(K)@11);AKGILFVGS…	18.1.1.11157.1;11.1.1.9285.1;1.1.1.3422.1;20.1.1.6973.1;8.1.1.9645.1;15.1.1.5980.1;10.1.1.8087.1;8.1.1.14178.1;8.1.1.9846.1;14.1.1.7294.1;6.1.1.10134.1;6.1.1.10048.1;5.1.1.10640.1;9.1.1.13527.1;7.1.1.5455.1;18.1.1.2997.1;5.1.1.10355.1;11.1.1.9331.1;8.1.1.13504.1;5.1.1.10420.1;10.1.1.8776.1;8.1.1.9652.1;6.1.1.9995.1;8.1.1.9423.1;5.1.1.10706.1;9.1.1.9154.1;10.1.1.5525.1;9.1.1.9166.1;8.1.1.9509.1	VDDFLANEAK(iTRAQ8plex@N-term; iTRAQ8plex(K)@10);HEMLPANLIQAQR(iTRAQ8plex@N-term);YGPSLMPGGNK(iTRAQ8plex@N-term; iTRAQ8plex(K)@11);VVQLEGSKK(iTRAQ8plex@N-term; iTRAQ8plex(K)@8; iTRAQ8plex(K)@9);LVPLLDTGDIIIDGGN(iTRAQ8plex@N-term);VVGAQSLKDMVSK(iTRAQ8plex@N-term; iTRAQ8plex(K)@8; iTRAQ8plex(K)@13);LVPLLDTGDIIIDGGNSEYRDTTR(iTRAQ8plex@N-term);AGQAVDDFIEK(iTRAQ8plex@N-term; iTRAQ8plex(K)@11);AKGILFVGS…	0.0001041	0.999999	0.0238925	0.145689	0.0364946	0.0473929	1.48594	1.08643	1.23595	1.34276	1.1272	1.18032	1.97697	1.52757	1.40605	1.35519	0.903649
891	4.35	3.71	sp|Q9JMG1|EDF1_MOUSE	Endothelial differentiation-related factor 1 OS=Mus musculus OX=10090 GN=Edf1 PE=1 SV=1	Q9JMG1	Edf1	MOUSE	16.3686	-0.930405	9.99	27.7	4	sp|Q9JMG1|EDF1_MOUSE	MAESDWDTVTVLRKKGPTAAQAKSKQAILAAQRRGEDVETSKKWAAGQNKQHSITKNTAKLDRETEELHHDRVTLEVGKVIQRGRQSKGLTQKDLATKINEKPQVIADYESGRAIPNNQVLGKIERAIGLKLRGKDIGKPIEKGPKAK	4	5	4	AIPNNQVLGK(iTRAQ8plex@N-term; iTRAQ8plex(K)@10);INEKPQVIADYESGR(iTRAQ8plex@N-term; Deamidated(N)@2; iTRAQ8plex(K)@4);AESDWDTVTVLRK(Protein Terminal Acetyl@N-term; iTRAQ8plex(K)@13);AIPNNQVLGKIER(iTRAQ8plex@N-term; iTRAQ8plex(K)@10)	8.1.1.6888.1;8.1.1.6978.1;15.1.1.8966.1;9.1.1.6960.1;4.1.1.4673.1	AIPNNQVLGK(iTRAQ8plex@N-term; iTRAQ8plex(K)@10);INEKPQVIADYESGR(iTRAQ8plex@N-term; Deamidated(N)@2; iTRAQ8plex(K)@4);AESDWDTVTVLRK(Protein Terminal Acetyl@N-term; iTRAQ8plex(K)@13);AIPNNQVLGKIER(iTRAQ8plex@N-term; iTRAQ8plex(K)@10)	1	1	1	AIPNNQVLGK(iTRAQ8plex@N-term; iTRAQ8plex(K)@10)	7.1.1.4599.1	AIPNNQVLGK(iTRAQ8plex@N-term; iTRAQ8plex(K)@10)	1	2	1	AESDWDTVTVLR(Protein Terminal Acetyl@N-term)	9.1.1.11608.1;7.1.1.11888.1	AESDWDTVTVLR(Protein Terminal Acetyl@N-term)	0.0100248	0.0266722	0.999993	0.0129755	0.0472138	0.0506835	0.990832	0.816582	0.879022	1.20226	1.0666	1.11686	1	0.772681	0.809096	1.27057	1.03753
1295	6.42	2.79	sp|P07361|A1AG2_MOUSE	Alpha-1-acid glycoprotein 2 OS=Mus musculus OX=10090 GN=Orm2 PE=1 SV=1	P07361	Orm2	MOUSE	23.8432	-0.352174	5.27	20.29	4	sp|P07361|A1AG2_MOUSE	MALHMILVMVSLLPLLEAQNPEHVNITIGDPITNETLSWLSDKWFFIGAAVLNPDYRQEIQKTQMVFFNLTPNLINDTMELREYHTIDDHCVYNSTHLGIQRENGTLSKYVGGVKIFADLIVLKMHGAFMLAFDLKDEKKRGLSLNAKRPDITPELREVFQKAVTHVGMDESEIIFVDWKKDRCSQQEKQQLELEKETKKDPEEGQA	2	18	1	AVTHVGMDESEIIFVDWK(iTRAQ8plex@N-term; iTRAQ8plex(K)@18);IFADLIVLK(iTRAQ8plex@N-term; iTRAQ8plex(K)@9)	2.1.1.14760.1;2.1.1.14658.1;2.1.1.14546.1;2.1.1.14695.1;2.1.1.14423.1;17.1.1.12980.1;2.1.1.14512.1;2.1.1.14615.1;2.1.1.14629.1;2.1.1.14353.1;2.1.1.14731.1;2.1.1.14768.1;2.1.1.14276.1;2.1.1.14788.1;2.1.1.14582.1;2.1.1.14473.1;2.1.1.14442.1;2.1.1.14421.1	IFADLIVLK(iTRAQ8plex@N-term; iTRAQ8plex(K)@9)	1	1	1	IFADLIVLK(iTRAQ8plex@N-term; iTRAQ8plex(K)@9)	19.1.1.13707.1	IFADLIVLK(iTRAQ8plex@N-term; iTRAQ8plex(K)@9)	4	5	2	AVTHVGMDESEIIFVDWK(iTRAQ8plex@N-term; iTRAQ8plex(K)@18);IFADLIVLK(iTRAQ8plex@N-term; iTRAQ8plex(K)@9);QLELEK(iTRAQ8plex@N-term; iTRAQ8plex(K)@6);RPDITPELR(iTRAQ8plex@N-term)	2.1.1.12719.1;19.1.1.14237.1;17.1.1.13403.1;10.1.1.3857.1;18.1.1.2574.1	IFADLIVLK(iTRAQ8plex@N-term; iTRAQ8plex(K)@9);RPDITPELR(iTRAQ8plex@N-term)	0.031504	0.238504	0.0307007	0.0209323	0.0692659	0.263303	1.27057	1.55597	1.30617	0.801678	0.831764	0.954993	1.58489	1.94089	1.99526	0.801678	1.00925
1795	16.57	13.22	sp|Q8BGD9|IF4B_MOUSE	Eukaryotic translation initiation factor 4B OS=Mus musculus OX=10090 GN=Eif4b PE=1 SV=1	Q8BGD9	Eif4b	MOUSE	68.8392	-1.53895	5.46	14.57	8	sp|Q8BGD9|IF4B_MOUSE;tr|Q3TDD8|Q3TDD8_MOUSE;tr|Q3TLQ9|Q3TLQ9_MOUSE;tr|Q3TSY9|Q3TSY9_MOUSE;tr|Q3UGC0|Q3UGC0_MOUSE	MAASAKKKNKKGKTISLTDFLAEDGGTGGGSTYVPKPVSWADETDDLEGDVSTTWHSNDDDVYRAPPIDRSILPTAPRAAREPNIDRSRLPKSPPYTAFLGNLPYDVTEDSIKDFFRGLNISAVRLPREPSNPDRLKGFGYAEFEDLDSLLSALSLNEESLGNRRIRVDVADQAQDKDRDDRSFGRDRNRDSDKTDTDWRARPTTDSFDDYPPRRGDDSFGDKYRDRYDSDRYRDGYRDGYRDGPRRDMDRYGGRDRYDDRGSRDYDRGYDSRIGSGRRAFGSGYRRDDDYRGGGDRYEDRYDRRDDRSWSSRDDYSRDDYRRDDRGPPQRPRLNLKPRSAPKEDDASASTSQSSRAASIFGGAKPVDTAAREREVEERLQKEQEKLQRQLDEPKLDRR…	8	12	8	SQSSDTEQPSPTSGGGK(iTRAQ8plex@N-term; Phospho(S)@4; iTRAQ8plex(K)@17);ARPTTDSFDDYPPR(iTRAQ8plex@N-term);DSDKTDTDWR(iTRAQ8plex@N-term; iTRAQ8plex(K)@4);SQSSDTEQPSPTSGGGK(iTRAQ8plex@N-term; iTRAQ8plex(K)@17);RGDDSFGDKYR(iTRAQ8plex@N-term; iTRAQ8plex(K)@9);VAAVQPPEEGPSR(iTRAQ8plex@N-term);YAALSVDGEDEDEGDDCTE(iTRAQ8plex@N-term; Methylthio(C)@17);QAQDK(iTRAQ8plex@N-term; Deamidated(Q)@1; iTRAQ8plex(K)@…	12.1.1.96.1;8.1.1.862.1;19.1.1.297.1;8.1.1.3302.1;8.1.1.3189.1;13.1.1.423.1;4.1.1.9751.1;8.1.1.2918.1;18.1.1.973.1;4.1.1.9644.1;8.1.1.3130.1;8.1.1.3114.1	SQSSDTEQPSPTSGGGK(iTRAQ8plex@N-term; Phospho(S)@4; iTRAQ8plex(K)@17);DSDKTDTDWR(iTRAQ8plex@N-term; iTRAQ8plex(K)@4);ARPTTDSFDDYPPR(iTRAQ8plex@N-term);SQSSDTEQPSPTSGGGK(iTRAQ8plex@N-term; iTRAQ8plex(K)@17);RGDDSFGDKYR(iTRAQ8plex@N-term; iTRAQ8plex(K)@9);VAAVQPPEEGPSR(iTRAQ8plex@N-term);YAALSVDGEDEDEGDDCTE(iTRAQ8plex@N-term; Methylthio(C)@17);QAQDK(iTRAQ8plex@N-term; Deamidated(Q)@1; iTRAQ8plex(K)@…	6	9	6	SDTEQPSPTSGGGK(iTRAQ8plex@N-term; iTRAQ8plex(K)@14);SQSSDTEQPSPTSGGGK(iTRAQ8plex@N-term; iTRAQ8plex(K)@17);YAALSVDGEDEDEGDDCTE(iTRAQ8plex@N-term; Methylthio(C)@17);VAAVQPPEEGPSR(iTRAQ8plex@N-term);RGDDSFGDKYR(iTRAQ8plex@N-term; iTRAQ8plex(K)@9);SAPKEDDASASTSQSSR(iTRAQ8plex@N-term; iTRAQ8plex(K)@4)	12.1.1.9373.1;10.1.1.3050.1;2.1.1.310.1;1.1.1.256.1;11.1.1.798.1;20.1.1.192.1;1.1.1.304.1;20.1.1.107.1;1.1.1.264.1	SDTEQPSPTSGGGK(iTRAQ8plex@N-term; iTRAQ8plex(K)@14);SQSSDTEQPSPTSGGGK(iTRAQ8plex@N-term; iTRAQ8plex(K)@17);YAALSVDGEDEDEGDDCTE(iTRAQ8plex@N-term; Methylthio(C)@17);VAAVQPPEEGPSR(iTRAQ8plex@N-term);RGDDSFGDKYR(iTRAQ8plex@N-term; iTRAQ8plex(K)@9);SAPKEDDASASTSQSSR(iTRAQ8plex@N-term; iTRAQ8plex(K)@4)	7	11	6	SAPKEDDASASTSQSSR(iTRAQ8plex@N-term; iTRAQ8plex(K)@4; Deamidated(Q)@14);SILPTAPR(iTRAQ8plex@N-term);LQKEQEK(iTRAQ8plex@N-term; iTRAQ8plex(K)@3; iTRAQ8plex(K)@7);SQSSDTEQPSPTSGGGK(iTRAQ8plex@N-term; iTRAQ8plex(K)@17);VAAVQPPEEGPSR(iTRAQ8plex@N-term);SAPKEDDASASTSQSSR(Carbamyl@N-term; iTRAQ8plex(K)@4);SAPKEDDASASTSQSSR(iTRAQ8plex@N-term; iTRAQ8plex(K)@4)	10.1.1.3222.1;1.1.1.323.1;7.1.1.674.1;1.1.1.118.1;1.1.1.277.1;18.1.1.162.1;15.1.1.137.1;14.1.1.2982.1;1.1.1.167.1;19.1.1.248.1;12.1.1.171.1	SAPKEDDASASTSQSSR(iTRAQ8plex@N-term; iTRAQ8plex(K)@4; Deamidated(Q)@14);SILPTAPR(iTRAQ8plex@N-term);SQSSDTEQPSPTSGGGK(iTRAQ8plex@N-term; iTRAQ8plex(K)@17);VAAVQPPEEGPSR(iTRAQ8plex@N-term);SAPKEDDASASTSQSSR(Carbamyl@N-term; iTRAQ8plex(K)@4);SAPKEDDASASTSQSSR(iTRAQ8plex@N-term; iTRAQ8plex(K)@4)	0.00278604	0.0195983	0.15984	0.0276104	0.0477532	0.0831586	0.887156	0.457088	0.717794	1.90546	1.55597	1.23595	0.772681	0.37325	0.660694	2.01372	1.72187
2053	2	2	sp|Q9EPV8|UBL5_MOUSE	Ubiquitin-like protein 5 OS=Mus musculus OX=10090 GN=Ubl5 PE=1 SV=1	Q9EPV8	Ubl5	MOUSE	8.5469	-0.415068	8.58	12.33	1	sp|Q9EPV8|UBL5_MOUSE;tr|A0A1Y7VKT9|A0A1Y7VKT9_MOUSE;tr|E0CY38|E0CY38_MOUSE;tr|E0CY91|E0CY91_MOUSE;tr|E0CYW1|E0CYW1_MOUSE;tr|E0CZB3|E0CZB3_MOUSE	MIEVVCNDRLGKKVRVKCNTDDTIGDLKKLIAAQTGTRWNKIVLKKWYTIFKDHVSLGDYEIHDGMNLELYYQ	1	1	1	MIEVVCNDR(iTRAQ8plex@N-term; Methylthio(C)@6)	5.1.1.12462.1	MIEVVCNDR(iTRAQ8plex@N-term; Methylthio(C)@6)	2	2	1	ILFLK(iTRAQ8plex@N-term; iTRAQ8plex(K)@5);MIEVVCNDR(iTRAQ8plex@N-term; Methylthio(C)@6)	20.1.1.11511.1;8.1.1.12358.1	MIEVVCNDR(iTRAQ8plex@N-term; Methylthio(C)@6)	--	--	--	--	--	--	0.0192856	--	0.0488742	0.0374061	0.204835	0.0302924	0.946237	1.28233	1.03753	0.731139	0.801678	0.903649	0.937562	1.24738	1.01859	0.744732	0.801678
[truncated: 43 more columns]
