# Supplementary material for: Identification of proteins related to SIS3 by iTRAQ and PRM-based comparative proteomic analysis in cisplatin-induced acute kidney injury
Source: PeerJ journal article supplement (doi:10.7717/peerj.17485), 2024-06-04
Supplement: Table1.docx [file Table1.docx]

## Supplement Table 1

Differentially Expressed Proteins in comparison between Cisplatin group and Control group.

| **UniProtKB**  **ID** | **Protein**  **Name** | **Fold**  **Change** | **p-value** |
| --- | --- | --- | --- |
| **Up-regulation** |  |  |  |
| Q9JIL4 | Pdzk1 | 1.278 | 0.046669227 |
| Q00623 | Apoa1 | 1.757 | 0.005596327 |
| Q9R0H0 | Acox1 | 1.207 | 0.020577892 |
| P35700 | Prdx1 | 1.278 | 0.047085258 |
| P07901 | Hsp90aa1 | 1.331 | 0.005503922 |
| P62960 | Ybx1 | 1.425 | 0.034175908 |
| P08905 | Lyz2 | 1.233 | 0.010431465 |
| P09405 | Ncl | 1.535 | 0.041582943 |
| O70475 | Ugdh | 1.363 | 0.028805939 |
| P09602 | Hmgn2 | 1.302 | 0.002156368 |
| Q9DCD0 | Pgd | 1.351 | 0.0001041 |
| Q9JMG1 | Edf1 | 1.221 | 0.01002477 |
| Q9EQK5 | Mvp | 1.372 | 0.027645105 |
| P14069 | S100a6 | 1.253 | 0.012990537 |
| A0A2R8VHF9 | Myh11 | 1.336 | 0.010142436 |
| Q9CQN3 | Tomm6 | 1.202 | 0.0318048 |
| P01868 | Ighg1 | 1.903 | 0.034296438 |
| Q9QXS1 | Plec | 1.469 | 0.045651193 |
| Q8BGD9 | Eif4b | 2.029 | 0.00278604 |
| E9Q3V2 | Slc35a3 | 1.558 | 0.039267692 |
| Q9R1J0 | Nsdhl | 1.355 | 0.033344608 |
| Q6PB44 | Ptpn23 | 1.527 | 0.015203687 |
| P01867 | Igh-3 | 1.222 | 0.017517121 |
| Q99LD4 | Gps1 | 1.211 | 0.034309708 |
| Q9QYF1 | Rdh11 | 1.31 | 0.000516131 |
| Q7TQH0 | Atxn2l | 1.223 | 0.043392992 |
| **Down-regulation** |  |  |  |
| P16460 | Ass1 | 0.788 | 0.013053488 |
| Q91XE4 | Acy3 | 0.804 | 0.043817069 |
| Q99JW2 | Acy1 | 0.642 | 0.039338813 |
| Q9CPY7 | Lap3 | 0.73 | 0.011213916 |
| O88569 | Hnrnpa2b1 | 0.749 | 0.026293785 |
| Q9QXD6 | Fbp1 | 0.748 | 0.03951965 |
| Q8BVI4 | Qdpr | 0.693 | 0.007620351 |
| Q8K0L3 | Acsm2 | 0.804 | 0.048836451 |
| Q9D051 | Pdhb | 0.823 | 0.044030463 |
| Q9CZ13 | Uqcrc1 | 0.745 | 0.030533049 |
| P52480 | Pkm | 0.632 | 0.022177396 |
| P50247 | Ahcy | 0.805 | 0.021503756 |
| P50544 | Acadvl | 0.81 | 0.011761471 |
| Q8K2B3 | Sdha | 0.76 | 0.018720158 |
| Q8BMS1 | Hadha | 0.76 | 0.020465284 |
| Q99JY0 | Hadhb | 0.791 | 0.034705635 |
| Q80XN0 | Bdh1 | 0.79 | 0.007174541 |
| P04117 | Fabp4 | 0.807 | 0.010446226 |
| Q91XE0 | Glyat | 0.618 | 0.025456412 |
| Q64105 | Spr | 0.688 | 0.006651663 |
| Q07417 | Acads | 0.663 | 0.001555734 |
| Q91WS0 | Cisd1 | 0.827 | 0.007968251 |
| Q91VR2 | Atp5f1c | 0.629 | 0.015515951 |
| P63323 | Rps12 | 0.714 | 0.028220701 |
| P16332 | Mmut | 0.817 | 0.014156432 |
| Q91X72 | Hpx | 0.777 | 0.028890976 |
| Q8K3J1 | Ndufs8 | 0.828 | 0.032901347 |
| P15105 | Glul | 0.48 | 0.004346499 |
| Q99K67 | Aass | 0.746 | 0.012458548 |
| Q8K1Z0 | Coq9 | 0.789 | 0.047220539 |
| Q5FWB6 | Rplp0 | 0.695 | 0.006987732 |
| P16331 | Pah | 0.736 | 0.010724957 |
| Q8BMJ3 | Eif1ax | 0.708 | 0.042378616 |
| O35969 | Gamt | 0.741 | 0.042169729 |
| P14824 | Anxa6 | 0.771 | 0.004263226 |
| Q62433 | Ndrg1 | 0.654 | 0.011045568 |
| P41216 | Acsl1 | 0.725 | 0.013072449 |
| P55302 | Lrpap1 | 0.81 | 0.022529506 |
| P00405 | Mtco2 | 0.754 | 0.008514744 |
| Q8CGK3 | Lonp1 | 0.716 | 0.003099751 |
| Q05816 | Fabp5 | 0.805 | 0.025383383 |
| Q9DBE0 | Csad | 0.752 | 0.002419209 |
| Q91V92 | Acly | 0.732 | 0.017138509 |
| P07361 | Orm2 | 0.765 | 0.031504033 |
| Q91WT9 | Cbs | 0.806 | 0.040452895 |
| P19096 | Fasn | 0.607 | 0.00585726 |
| O54749 | Cyp2j5 | 0.746 | 0.021121377 |
| Q9JHU4 | Dync1h1 | 0.762 | 0.047818888 |
| Q8VDJ3 | Hdlbp | 0.66 | 0.007431471 |
| Q9D2R0 | Aacs | 0.786 | 0.037372421 |
| Q9D7X8 | Ggct | 0.764 | 0.018580581 |
| Q60825 | Slc34a1 | 0.745 | 0.031982401 |
| Q9EPV8 | Ubl5 | 0.738 | 0.019285621 |
| Q8R5F3 | Oard1 | 0.773 | 0.048659749 |
| Q61024 | Asns | 0.809 | 0.027661616 |
| Q9WTX2 | Prkra | 0.817 | 0.028917301 |
| P11714 | Cyp2d9 | 0.815 | 0.022184261 |
| Q8BXK8 | Agap1 | 0.807 | 0.000815323 |
| Q91V12 | Acot7 | 0.802 | 0.026510564 |
| Q80SU6 | Slc34a3 | 0.814 | 0.005523067 |
| A2RSX7 | Tyw5 | 0.645 | 0.032623696 |
