# Supplementary material for: Identification of proteins related to SIS3 by iTRAQ and PRM-based comparative proteomic analysis in cisplatin-induced acute kidney injury
Source: PeerJ journal article supplement (doi:10.7717/peerj.17485), 2024-06-04
Supplement: Table2.docx [file Table2.docx]

## Supplement Table 2

Differentially Expressed Proteins in comparison between SIS3 group and Control group.

| **UniProtKB**  **ID** | **Protein**  **Name** | **Fold**  **Change** | **p-value** |
| --- | --- | --- | --- |
| **Up-regulation** |  |  |  |
| P02089 | Hbb-b2 | 2.608 | 0.039615175 |
| Q9CWS5 | -- | 1.373 | 0.04012503 |
| Q00623 | Apoa1 | 2.59 | 0.010690922 |
| Q923D2 | Blvrb | 1.488 | 0.028125381 |
| P07724 | Alb | 2.594 | 0.03231444 |
| P35700 | Prdx1 | 1.424 | 0.00390894 |
| P09528 | Fth1 | 1.245 | 0.017577558 |
| Q921I1 | Tf | 1.719 | 0.005506882 |
| P08226 | Apoe | 1.276 | 0.023350949 |
| P08905 | Lyz2 | 1.229 | 0.006179646 |
| Q91X72 | Hpx | 1.437 | 0.00136172 |
| Q8VCM7 | Fgg | 1.312 | 0.014156553 |
| E9PV24 | Fga | 1.578 | 0.024477192 |
| A0A0B6VQ20 | LC | 1.473 | 0.030292287 |
| Q61613 | Orm1 | 1.279 | 0.002025123 |
| Q9DCD0 | Pgd | 1.336 | 0.047392888 |
| Q61646 | Hp | 1.537 | 0.016703566 |
| Q9EQK5 | Mvp | 1.346 | 0.028964752 |
| Q91WP6 | Serpina3n | 2.396 | 0.006834112 |
| P01863 | Ighg | 1.842 | 0.024187003 |
| P01027 | C3 | 1.489 | 0.012906028 |
| P31532 | Saa4 | 1.213 | 0.030292846 |
| P31725 | S100a9 | 1.34 | 0.013462734 |
| A0A2R8VHF9 | Myh11 | 1.429 | 0.006695008 |
| P15327 | Bpgm | 1.37 | 0.044572763 |
| Q61147 | Cp | 1.327 | 0.002237227 |
| P15508 | Sptb | 2.202 | 0.005283139 |
| P12246 | Apcs | 1.727 | 0.03086879 |
| O08677 | Kng1 | 1.605 | 0.00029503 |
| P11276 | Fn1 | 1.288 | 0.016251877 |
| O08692 | Ngp | 1.232 | 0.006000979 |
| P01868 | Ighg1 | 1.256 | 0.013596541 |
| P01592 | Jchain | 1.236 | 0.027661296 |
| Q99K85 | Psat1 | 1.601 | 0.018230446 |
| P97348 | Rhod | 1.252 | 0.013423465 |
| P08032 | Spta1 | 1.923 | 6.61175E-05 |
| Q9QXS1 | Plec | 1.511 | 0.025817566 |
| Q02357 | Ank1 | 1.533 | 0.003756996 |
| P04919 | Slc4a1 | 1.399 | 0.011498033 |
| E9Q3V2 | Slc35a3 | 1.449 | 0.017053626 |
| Q9ESB3 | Hrg | 1.575 | 0.043919094 |
| P01635 | -- | 1.512 | 0.030178419 |
| P01029 | C4b | 1.437 | 0.003713784 |
| Q9JLB4 | Cubn | 1.356 | 0.003955619 |
| O89020 | Afm | 1.22 | 0.049108225 |
| Q6PB44 | Ptpn23 | 1.248 | 0.004026573 |
| Q61703 | Itih2 | 1.579 | 0.042370654 |
| Q9ERN0 | Scamp2 | 1.212 | 0.047393343 |
| P49182 | Serpind1 | 1.222 | 0.01549056 |
| P16301 | Lcat | 1.271 | 0.048875251 |
| Q8BTN4 | Uba7 | 1.276 | 0.012010812 |
| Q9QYF1 | Rdh11 | 1.322 | 0.000844234 |
| Q6KAN1 | Gbp7 | 1.236 | 0.027661296 |
| **Down-regulation** |  |  |  |
| P63038 | Hspd1 | 0.683 | 0.035098713 |
| P56480 | Atp5f1b | 0.577 | 0.037148779 |
| P26350 | Ptma | 0.798 | 0.02343731 |
| Q60932 | Vdac1 | 0.776 | 0.012953358 |
| O88844 | Idh1 | 0.673 | 0.022197035 |
| Q3TVZ1 | Cat | 0.752 | 0.038812594 |
| P16858 | Gapdh | 0.519 | 0.039347132 |
| P16460 | Ass1 | 0.57 | 0.028478869 |
| Q9DBJ1 | Pgam1 | 0.742 | 0.000106263 |
| Q99LC5 | Etfa | 0.769 | 0.023609408 |
| P0CG49 | Ubb | 0.783 | 0.014820132 |
| Q91XE4 | Acy3 | 0.687 | 0.037631338 |
| Q99JW2 | Acy1 | 0.559 | 0.032663491 |
| P11352 | Gpx1 | 0.625 | 0.024809985 |
| O88569 | Hnrnpa2b1 | 0.518 | 0.003892778 |
| Q8BVI4 | Qdpr | 0.579 | 0.035699845 |
| Q8K0L3 | Acsm2 | 0.825 | 0.028235868 |
| Q8R164 | Bphl | 0.807 | 0.022102165 |
| Q9D051 | Pdhb | 0.762 | 0.01202547 |
| Q99L13 | Hibadh | 0.819 | 0.000236601 |
| P26443 | Glud1 | 0.817 | 0.004786349 |
| P97807 | Fh | 0.8 | 0.0112539 |
| Q9Z2I9 | Sucla2 | 0.665 | 0.000903297 |
| P10126 | Eef1a1 | 0.802 | 0.006872939 |
| P50247 | Ahcy | 0.64 | 0.01342345 |
| P50544 | Acadvl | 0.818 | 0.040754417 |
| Q8VDN2 | Atp1a1 | 0.68 | 0.011696316 |
| P14152 | Mdh1 | 0.77 | 0.002619424 |
| Q8K2B3 | Sdha | 0.736 | 0.004272464 |
| O08749 | Dld | 0.711 | 0.048064478 |
| Q91WU0 | Ces1f | 0.708 | 0.038103131 |
| Q91XE0 | Glyat | 0.439 | 0.007849003 |
| P34914 | Ephx2 | 0.705 | 0.002987486 |
| O35488 | Slc27a2 | 0.824 | 0.000754992 |
| Q64105 | Spr | 0.748 | 0.021034645 |
| Q07417 | Acads | 0.694 | 0.046238312 |
| Q91WS0 | Cisd1 | 0.752 | 0.012257859 |
| P62960 | Ybx1 | 0.463 | 0.001630891 |
| Q91VR2 | Atp5f1c | 0.543 | 0.025279929 |
| Q9Z0X1 | Aifm1 | 0.825 | 0.011878678 |
| Q60872 | Eif1a | 0.793 | 0.023229771 |
| Q8K3J1 | Ndufs8 | 0.697 | 0.008998058 |
| P02301 | H3-5 | 0.82 | 0.014802403 |
| Q9CZU6 | Cs | 0.597 | 0.047882733 |
| Q8K1Z0 | Coq9 | 0.723 | 0.008001891 |
| Q5FWB6 | Rplp0 | 0.722 | 0.019420962 |
| P16331 | Pah | 0.831 | 0.048846778 |
| Q8BMJ3 | Eif1ax | 0.576 | 0.042378634 |
| P14824 | Anxa6 | 0.587 | 0.003842191 |
| Q61029 | Tmpo | 0.811 | 0.046346186 |
| P41216 | Acsl1 | 0.749 | 0.002143381 |
| P40936 | Inmt | 0.477 | 0.014268136 |
| Q8VIM4 | Bsnd | 0.605 | 0.024474106 |
| Q9WUZ9 | Entpd5 | 0.765 | 0.028321059 |
| P00405 | Mtco2 | 0.773 | 0.011285606 |
| P55096 | Abcd3 | 0.643 | 0.004455003 |
| Q9R022 | Dnajc12 | 0.352 | 0.025270047 |
| Q05816 | Fabp5 | 0.778 | 0.019211663 |
| Q9DBE0 | Csad | 0.702 | 0.021645569 |
| D3Z6I7 | Cald1 | 0.711 | 0.018901805 |
| Q91V92 | Acly | 0.709 | 0.043400638 |
| Q91WT9 | Cbs | 0.785 | 0.007760036 |
| P19096 | Fasn | 0.709 | 0.020570694 |
| Q99JY3 | Gimap4 | 0.833 | 0.044363089 |
| Q5SWT3 | Slc25a35 | 0.811 | 0.044702425 |
| Q9D2R0 | Aacs | 0.706 | 0.017752247 |
| Q3UMF0 | Cobll1 | 0.557 | 0.001995058 |
| P11714 | Cyp2d9 | 0.83 | 0.03101331 |
| Q91V12 | Acot7 | 0.82 | 0.044343265 |
| Q60991 | Cyp7b1 | 0.807 | 0.012221248 |
| Q8K3J9 | Gprc5c | 0.692 | 0.019945696 |
| Q8BM55 | Tmem214 | 0.768 | 0.045797927 |
