# Supplementary material for: Identification of proteins related to SIS3 by iTRAQ and PRM-based comparative proteomic analysis in cisplatin-induced acute kidney injury
Source: PeerJ journal article supplement (doi:10.7717/peerj.17485), 2024-06-04
Supplement: Table3.docx [file Table3.docx]

## Supplement Table 3

Differentially Expressed Proteins in comparison between Cisplatin+SIS3 group and Cisplatin group.

| **UniProtKB**  **ID** | **Protein**  **Name** | **Fold**  **Change** | **p-value** |
| --- | --- | --- | --- |
| **Up-regulation** |  |  |  |
| P02089 | Hbb-b2 | 2.624 | 0.000800292 |
| P02088 | Hbb-b1 | 2.512 | 0.006366085 |
| Q8BPF4 | -- | 1.938 | 0.031427153 |
| O88844 | Idh1 | 1.416 | 0.02956613 |
| Q00623 | Apoa1 | 1.738 | 0.001201535 |
| Q923D2 | Blvrb | 1.524 | 0.003234286 |
| A2BIM8 | Mup18 | 2.317 | 0.012243985 |
| P52480 | Pkm | 1.286 | 0.04401047 |
| Q01853 | Vcp | 1.234 | 0.039869997 |
| P06728 | Apoa4 | 2.345 | 0.006589908 |
| Q9Z2V4 | Pck1 | 3.764 | 0.024692189 |
| P04117 | Fabp4 | 1.369 | 0.012173097 |
| Q91XE0 | Glyat | 1.307 | 0.046209275 |
| P29699 | Ahsg | 3.157 | 0.044748688 |
| Q64105 | Spr | 1.247 | 0.047730369 |
| Q921I1 | Tf | 2.033 | 0.018680643 |
| P63323 | Rps12 | 1.624 | 0.038194264 |
| Q91X72 | Hpx | 1.925 | 0.001846356 |
| Q8K0E8 | Fgb | 3.908 | 0.030990219 |
| Q8VCM7 | Fgg | 3.274 | 0.045202966 |
| E9PV24 | Fga | 2.891 | 0.010775381 |
| A0A0B6VQ20 | LC | 1.714 | 0.016320021 |
| Q62433 | Ndrg1 | 1.912 | 0.001434436 |
| O70475 | Ugdh | 1.635 | 0.026581126 |
| Q9WUZ9 | Entpd5 | 1.451 | 0.026607473 |
| Q61646 | Hp | 3.621 | 0.013580315 |
| Q91WP6 | Serpina3n | 4.133 | 0.003390059 |
| P01863 | Ighg | 1.59 | 0.014606992 |
| P01027 | C3 | 1.755 | 0.011948807 |
| Q8C5B4 | -- | 1.771 | 0.030780063 |
| P01899 | H2-D1 | 1.244 | 0.014174026 |
| P15327 | Bpgm | 1.557 | 0.01914354 |
| P18242 | Ctsd | 1.915 | 0.01222121 |
| Q61147 | Cp | 1.803 | 0.000731615 |
| P07361 | Orm2 | 1.868 | 0.020932254 |
| P28665 | Mug1 | 1.484 | 0.032280904 |
| P15508 | Sptb | 1.721 | 0.007690555 |
| P12246 | Apcs | 2.105 | 0.013672707 |
| O08677 | Kng1 | 1.833 | 0.012139903 |
| P11276 | Fn1 | 1.591 | 0.016768495 |
| O08692 | Ngp | 1.616 | 0.004530194 |
| Q01339 | Apoh | 1.608 | 0.047143175 |
| Q8CFX1 | H6pd | 1.688 | 0.006204741 |
| Q99K85 | Psat1 | 1.425 | 0.007698415 |
| P08032 | Spta1 | 1.692 | 0.003165375 |
| P21614 | Gc | 1.323 | 0.001926515 |
| O08691 | Arg2 | 1.324 | 0.01980401 |
| Q9Z0K8 | Vnn1 | 1.237 | 0.022529733 |
| Q02357 | Ank1 | 1.314 | 0.000882533 |
| P04919 | Slc4a1 | 1.608 | 0.010254979 |
| Q9EPV8 | Ubl5 | 1.265 | 0.037406113 |
| Q9WVB0 | Rbpms | 1.207 | 0.031745581 |
| Q8VI47 | Abcc2 | 1.548 | 0.03651984 |
| P50172 | Hsd11b1 | 1.203 | 0.010660375 |
| P20918 | Plg | 1.866 | 0.000896654 |
| Q9JLB4 | Cubn | 1.218 | 0.01175244 |
| O35744 | Chil3 | 2.344 | 0.035247211 |
| Q9Z2G9 | Htatip2 | 1.301 | 0.025688171 |
| A0A075B5N7 | Igkv6-13 | 1.271 | 0.048875251 |
| Q8CGN5 | Plin1 | 1.219 | 0.04434366 |
| Q61703 | Itih2 | 1.377 | 0.003952069 |
| G3UWD9 | Slc17a3 | 1.256 | 0.008829796 |
| Q9JI78 | Ngly1 | 1.265 | 0.012481498 |
| P36371 | Tap2 | 1.236 | 0.008092437 |
| Q8BGN3 | Enpp6 | 1.233 | 0.021557607 |
| Q6KAR6 | Exoc3 | 1.226 | 0.033997104 |
| Q9EQH2 | Erap1 | 1.265 | 0.02851122 |
| P51655 | Gpc4 | 1.236 | 0.027661296 |
| **Down-regulation** |  |  |  |
| P17182 | Eno1 | 0.818 | 0.03708614 |
| P63038 | Hspd1 | 0.694 | 7.06087E-05 |
| P56480 | Atp5f1b | 0.674 | 0.010818797 |
| P26350 | Ptma | 0.649 | 0.004645258 |
| Q60932 | Vdac1 | 0.817 | 0.014156432 |
| Q3TVZ1 | Cat | 0.682 | 0.02527452 |
| Q03265 | Atp5f1a | 0.762 | 0.015296312 |
| Q8QZT1 | Acat1 | 0.709 | 0.001273074 |
| Q9JIL4 | Pdzk1 | 0.571 | 0.015606332 |
| P0CG49 | Ubb | 0.716 | 0.01052094 |
| Q9D0J8 | Ptms | 0.447 | 0.002132844 |
| Q99JW2 | Acy1 | 0.758 | 0.026557007 |
| P45952 | Acadm | 0.493 | 0.037277125 |
| P11352 | Gpx1 | 0.686 | 0.027921763 |
| Q99KI0 | Aco2 | 0.675 | 0.019089392 |
| P38647 | Hspa9 | 0.772 | 0.024148159 |
| Q8R164 | Bphl | 0.788 | 0.014944158 |
| P56395 | Cyb5a | 0.643 | 0.016875707 |
| Q9D3D9 | Atp5f1d | 0.498 | 0.041964687 |
| P27773 | Pdia3 | 0.686 | 0.001779885 |
| P11930 | Nudt19 | 0.65 | 0.026346164 |
| P50247 | Ahcy | 0.817 | 0.020689593 |
| Q8VDN2 | Atp1a1 | 0.582 | 0.024910406 |
| P35700 | Prdx1 | 0.777 | 0.030085237 |
| Q8K2B3 | Sdha | 0.742 | 0.024477161 |
| P29758 | Oat | 0.681 | 0.035634616 |
| Q91WU0 | Ces1f | 0.643 | 0.015380887 |
| P97328 | Khk | 0.727 | 0.00830876 |
| Q9D964 | Gatm | 0.57 | 0.006087626 |
| O35488 | Slc27a2 | 0.784 | 0.029714798 |
| Q9CRB9 | Chchd3 | 0.601 | 0.016199207 |
| P35486 | Pdha1 | 0.822 | 0.026270976 |
| Q91WT7 | Akr1c14 | 0.638 | 0.010387048 |
| P45376 | Akr1b1 | 0.797 | 0.005613444 |
| Q9Z0X1 | Aifm1 | 0.678 | 0.007782221 |
| P58044 | Idi1 | 0.808 | 0.0399241 |
| P09405 | Ncl | 0.787 | 0.044998986 |
| P16331 | Pah | 0.631 | 0.003712545 |
| O35143 | ATP5IF1 | 0.83 | 0.019819435 |
| Q64462 | Cyp4b1 | 0.743 | 0.046067791 |
| P40936 | Inmt | 0.631 | 0.011550604 |
| Q8VIM4 | Bsnd | 0.506 | 0.025825861 |
| Q9JMG1 | Edf1 | 0.81 | 0.01297554 |
| Q61847 | Mep1b | 0.654 | 0.012992182 |
| E9PVU0 | Myo6 | 0.751 | 0.01923574 |
| Q9R022 | Dnajc12 | 0.323 | 0.031995847 |
| Q9DBE0 | Csad | 0.8 | 0.029251865 |
| Q6PHN9 | Rab35 | 0.722 | 0.048005394 |
| D3Z6I7 | Cald1 | 0.5 | 0.021394332 |
| P26645 | Marcks | 0.81 | 0.018979364 |
| E9Q616 | Ahnak | 0.743 | 0.007045667 |
| Q8CC88 | Vwa8 | 0.725 | 0.011499245 |
| P10637 | Mapt | 0.504 | 0.011416295 |
| Q9ERB0 | Snap29 | 0.791 | 0.034705615 |
| Q9D2R0 | Aacs | 0.689 | 0.013688446 |
| Q8BGD9 | Eif4b | 0.36 | 0.027610435 |
| Q3UMF0 | Cobll1 | 0.463 | 0.027456597 |
| Q60598 | Cttn | 0.83 | 0.031746035 |
| Q8R1K1 | Ubac2 | 0.825 | 0.020515017 |
| A2TJV2 | Palm3 | 0.832 | 0.031804585 |
| E0CXD4 | Pcdh1 | 0.735 | 0.0274514 |
| Q6DFV7 | Ncoa7 | 0.78 | 0.023567723 |
