# Supplementary material for: Identification of proteins related to SIS3 by iTRAQ and PRM-based comparative proteomic analysis in cisplatin-induced acute kidney injury
Source: PeerJ journal article supplement (doi:10.7717/peerj.17485), 2024-06-04
Supplement: Western_blot.xls [file Western_blot.xls]

## Sheet: CPT1A
		Gray Value of CPT1A	Gray Value of GAPDH
1	Ctrl	29852.4	31041
	SIS3	14008.8	35789.6
	Cisplatin	1257.88	35079
	Cis+SIS3	11620.2	19486.2
2	Ctrl	40761.3	32183.1
	SIS3	28483.7	26601.6
	Cisplatin	22786	37447
	Cis+SIS3	31165.4	29303
3	Ctrl	37297.5	40692.9
	SIS3	23126	28082.2
	Cisplatin	1831.1	30221.8
	Cis+SIS3	18959.3	28091.8
4	Ctrl	25216.4	32114.5
	SIS3	34054.2	32078.2
	Cisplatin	9019.22	34752.2
	Cis+SIS3	20489.4	27086

## Sheet: PPAR-α
		Gray Value of PPAR-α	Gray Value of GAPDH
1	Ctrl	37785.4	26224.4
	SIS3	34612.1	34673
	Cisplatin	27864.8	32446.2
	Cis+SIS3	32636.7	35937.2
2	Ctrl	28646.1	21668.3
	SIS3	23503.2	32477.9
	Cisplatin	23200.6	31300.5
	Cis+SIS3	38293.9	37459.9
3	Ctrl	37630.5	33058.4
	SIS3	30372	26069.7
	Cisplatin	26738.1	29001.8
	Cis+SIS3	32179.2	22372.9
4	Ctrl	26655.3	38576.9
	SIS3	19713	35089
	Cisplatin	20793.5	35330.6
	Cis+SIS3	36270.7	34740.5
5	Ctrl	28659.8	26407.7
	SIS3	25082.6	36993.1
	Cisplatin	32298.2	36877.8
	Cis+SIS3	38636.4	30295.6
6	Ctrl	31394.4	26067.9
	SIS3	26697.6	36698.1
	Cisplatin	32547.6	37391.5
	Cis+SIS3	38693.9	30563.1

## Sheet: SCD1
		Gray Value of SCD1	Gray Value of GAPDH
1	Ctrl	21767.4	39684.2
	SIS3	22921.4	24234.3
	Cisplatin	38910.4	28532.8
	Cis+SIS3	28294.4	34888.4
2	Ctrl	10854.8	23701.6
	SIS3	18335.3	28703
	Cisplatin	36144.8	32526.8
	Cis+SIS3	20384.4	32792.8
3	Ctrl	25029.7	28060.6
	SIS3	10092.1	36155.9
	Cisplatin	50376.1	36436.6
	Cis+SIS3	23402.7	34776.7

## Sheet: SREBF1
		Gray Value of SREBF1	Gray Value of GAPDH
1	Ctrl	12260.7	20094.4
	SIS3	27061.1	28925.2
	Cisplatin	41035.9	36037.7
	Cis+SIS3	38334.7	45901.1
2	Ctrl	20357.4	29361.2
	SIS3	14040.5	27051.9
	Cisplatin	31446.9	29973.3
	Cis+SIS3	23240.1	43079.7
3	Ctrl	7795	32283.4
	SIS3	12041.1	32739.3
	Cisplatin	38888.2	38691.8
	Cis+SIS3	26183.2	49695.3
4	Ctrl	3642.44	20692.2
	SIS3	1931.43	28839.3
	Cisplatin	36541	34940.8
	Cis+SIS3	18098.5	35058.4

## Sheet: NDRG1
		Gray Value of NDRG1	Gray Value of GAPDH
1	Ctrl	26948.6	23047.8
	SIS3	26363.1	25985.9
	Cisplatin	28078.3	41873.3
	Cis+SIS3	38940	38664.6
2	Ctrl	32257.6	27188.9
	SIS3	37397.9	30918.6
	Cisplatin	20936.5	32412.7
	Cis+SIS3	20989.1	24748.1
3	Ctrl	35121.7	30041.5
	SIS3	41012.9	34981.8
	Cisplatin	32690.8	31404.3
	Cis+SIS3	39469.7	34549.1
4	Ctrl	19729.7	16804.1
	SIS3	36201.8	29414.1
	Cisplatin	31387.3	41816.9
	Cis+SIS3	31406.7	26323.2

## Sheet: P-SMAD3、SMAD3
		Gray Value of P-SMAD3	Gray Value of SMAD3
1	Ctrl	14877	35357.9
	SIS3	16862.2	33502.5
	Cisplatin	38146.8	34489.8
	Cis+SIS3	20964.9	34526.5
2	Ctrl	24086.9	30807.4
	SIS3	20527.2	29424.7
	Cisplatin	38497.2	30546.8
	Cis+SIS3	25241.1	30153.9
3	Ctrl	27274.9	29182.7
	SIS3	21418.4	32716.8
	Cisplatin	36270.4	30318.4
	Cis+SIS3	26568.4	31477.2
